# Supplementary material for: Compilation and evaluation of gas phase diffusion coefficients of reactive trace gases in the atmosphere: Volume 2. Diffusivities of organic compounds, pressure-normalised mean free paths, and average Knudsen numbers for gas uptake calculations
Source: Copernicus journal article supplement (doi:10.5194/acp-15-5585-2015), 2015-05-21
Supplement: Supplementary file 1 [file acp-15-5585-2015-supplement.pdf]

Supplement of Atmos. Chem. Phys., 15, 5585–5598, 2015  
<http://www.atmos-chem-phys.net/15/5585/2015/>  
doi:10.5194/acp-15-5585-2015-supplement  
© Author(s) 2015. CC Attribution 3.0 License.

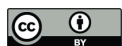

*Supplement of*

**Compilation and evaluation of gas phase diffusion coefficients of reactive trace gases in the atmosphere: Volume 2. Diffusivities of organic compounds, pressure-normalised mean free paths, and average Knudsen numbers for gas uptake calculations**

**M. J. Tang et al.**

*Correspondence to:* M. J. Tang ([mingjintang@gmail.com](mailto:mingjintang@gmail.com)) and M. Kalberer ([markus.kalberer@atm.ch.cam.ac.uk](mailto:markus.kalberer@atm.ch.cam.ac.uk))

The copyright of individual parts of the supplement might differ from the CC-BY 3.0 licence.

## Table of Contents

|                                                                                                                                                                                                                           |    |
|---------------------------------------------------------------------------------------------------------------------------------------------------------------------------------------------------------------------------|----|
| 1 Alkanes and cycloalkanes .....                                                                                                                                                                                          | 1  |
| 1.1 CH <sub>4</sub> (methane), C <sub>2</sub> H <sub>6</sub> (ethane), and C <sub>3</sub> H <sub>8</sub> (propane).....                                                                                                   | 1  |
| 1.2 C <sub>4</sub> H <sub>10</sub> (butane, methyl propane).....                                                                                                                                                          | 3  |
| 1.3 C <sub>5</sub> H <sub>12</sub> (n-pentane, methyl butane, dimethyl butane).....                                                                                                                                       | 5  |
| 1.4 C <sub>6</sub> H <sub>14</sub> (n-hexane, 2,3-dimethyl butane) .....                                                                                                                                                  | 7  |
| 1.5 C <sub>7</sub> H <sub>16</sub> (n-heptane, 2,4-dimethyl pentane).....                                                                                                                                                 | 9  |
| 1.6 C <sub>8</sub> H <sub>18</sub> (n-octane, 2,2,4-trimethyl pentane) .....                                                                                                                                              | 11 |
| 1.7 C <sub>9</sub> H <sub>20</sub> (n-nonane), C <sub>10</sub> H <sub>22</sub> (n-decane, 2,3,3-trimethyl heptane) and C <sub>12</sub> H <sub>26</sub> (n-dodecane) .....                                                 | 13 |
| 1.8 C <sub>16</sub> H <sub>34</sub> (n-hexadecane), C <sub>17</sub> H <sub>36</sub> (n-heptadecane) and C <sub>18</sub> H <sub>38</sub> (n-octadecane) .....                                                              | 15 |
| 1.9 C <sub>3</sub> H <sub>6</sub> (cyclopropane), C <sub>5</sub> H <sub>10</sub> (cyclopentane) and C <sub>6</sub> H <sub>12</sub> (cyclohexane, methyl cyclopentane) .....                                               | 17 |
| 2 Alkenes and alkynes .....                                                                                                                                                                                               | 19 |
| 2.1 C <sub>2</sub> H <sub>4</sub> (ethene) and C <sub>3</sub> H <sub>6</sub> (propene).....                                                                                                                               | 19 |
| 2.2 C <sub>4</sub> H <sub>8</sub> (1-butene, cis-2-butene, trans-2-butene, 2-methyl propene) .....                                                                                                                        | 21 |
| 2.3 C <sub>5</sub> H <sub>10</sub> (1-pentene), C <sub>6</sub> H <sub>12</sub> (1-hexene, 2-3-dimethyl-2-butene), C <sub>8</sub> H <sub>16</sub> (1-octene) .....                                                         | 22 |
| 2.4 C <sub>3</sub> H <sub>4</sub> (propadiene), C <sub>4</sub> H <sub>6</sub> (1,3-butadiene), C <sub>5</sub> H <sub>8</sub> (isoprene), C <sub>6</sub> H <sub>10</sub> (1,5-hexadiene, 2,3-dimethyl-1,2-butadiene) ..... | 24 |
| 2.5 C <sub>2</sub> H <sub>2</sub> (ethyne), C <sub>3</sub> H <sub>4</sub> (propyne), C <sub>4</sub> H <sub>6</sub> (1-butyne).....                                                                                        | 26 |
| 3 Aromatic hydrocarbons.....                                                                                                                                                                                              | 27 |
| 3.1 C <sub>6</sub> H <sub>6</sub> (benzene).....                                                                                                                                                                          | 27 |
| 3.2 C <sub>7</sub> H <sub>8</sub> (toluene).....                                                                                                                                                                          | 29 |
| 3.3 C <sub>8</sub> H <sub>10</sub> (ethyl benzene, o-xylene, m-xylene, p-xylene) .....                                                                                                                                    | 30 |
| 3.4 C <sub>9</sub> H <sub>12</sub> (n-propylbenzene, iso-propylbenzene, 1,2,4-trimethylbenzene, 1,3,5-trimethylbenzene) .....                                                                                             | 31 |
| 3.5 C <sub>10</sub> H <sub>14</sub> (p-cymene, p-tert-butyltoluene) and C <sub>8</sub> H <sub>8</sub> (styrene) .....                                                                                                     | 32 |
| 3.6 C <sub>10</sub> H <sub>8</sub> (naphthalene), C <sub>12</sub> H <sub>10</sub> (diphenyl), C <sub>14</sub> H <sub>10</sub> (anthracene).....                                                                           | 33 |
| 4 Alcohols .....                                                                                                                                                                                                          | 35 |
| 4.1 CH <sub>4</sub> O (methanol) .....                                                                                                                                                                                    | 35 |
| 4.2 C <sub>2</sub> H <sub>6</sub> O (ethanol).....                                                                                                                                                                        | 37 |
| 4.3 C <sub>3</sub> H <sub>8</sub> O (1-propanol, 2-propanol), C <sub>3</sub> H <sub>6</sub> O (prop-2-en-1-ol) .....                                                                                                      | 39 |
| 4.4 C <sub>4</sub> H <sub>10</sub> O (1-butanol, 2-butanol, methyl-1-propanol, methyl-2-propanol).....                                                                                                                    | 41 |

|     |                                                                                                                                                                                                                                                                                                                                     |    |
|-----|-------------------------------------------------------------------------------------------------------------------------------------------------------------------------------------------------------------------------------------------------------------------------------------------------------------------------------------|----|
| 4.5 | C <sub>5</sub> H <sub>12</sub> O (1-pentanol, 2-pentanol) .....                                                                                                                                                                                                                                                                     | 43 |
| 4.6 | C <sub>6</sub> H <sub>14</sub> O (1-hexanol, 2-ethyl-2-pentanol), C <sub>7</sub> H <sub>16</sub> O (1-heptanol), C <sub>8</sub> H <sub>18</sub> O (1-octanol) .....                                                                                                                                                                 | 44 |
| 4.7 | glycols .....                                                                                                                                                                                                                                                                                                                       | 45 |
| 5   | Aldehydes and ketones .....                                                                                                                                                                                                                                                                                                         | 46 |
| 5.1 | C <sub>3</sub> H <sub>6</sub> O (acetone).....                                                                                                                                                                                                                                                                                      | 46 |
| 5.2 | C <sub>4</sub> H <sub>8</sub> O (methyl ethyl ketone), C <sub>5</sub> H <sub>10</sub> O (methyl n-propyl ketone), C <sub>6</sub> H <sub>10</sub> O (4-methyl pent-3-en-2-one), C <sub>9</sub> H <sub>10</sub> O (isophorone) .....                                                                                                  | 48 |
| 5   | Acids .....                                                                                                                                                                                                                                                                                                                         | 49 |
| 6   | Ethers .....                                                                                                                                                                                                                                                                                                                        | 51 |
| 7   | Esters.....                                                                                                                                                                                                                                                                                                                         | 52 |
| 7.1 | C <sub>2</sub> H <sub>4</sub> O <sub>2</sub> (methyl formate), C <sub>3</sub> H <sub>6</sub> O <sub>2</sub> (ethyl formate, methyl acetate) .....                                                                                                                                                                                   | 52 |
| 7.2 | C <sub>4</sub> H <sub>8</sub> O <sub>2</sub> (propyl formate, ethyl acetate, methyl propionate) .....                                                                                                                                                                                                                               | 54 |
| 7.3 | C <sub>5</sub> H <sub>10</sub> O <sub>2</sub> (2-methylpropyl formate, n-propyl acetate, 2-methylethyl acetate, ethyl propionate, methyl n-butyrate, methyl isobutyrate).....                                                                                                                                                       | 56 |
| 7.4 | C <sub>6</sub> H <sub>12</sub> O <sub>2</sub> (n-pentyl formate, iso-pentyl formate, n-butyl acetate, 2-methylpropyl acetate, ethyl n-butyrate, ethyl isobutyrate, methyl n-pentanoate) .....                                                                                                                                       | 58 |
| 7.5 | C <sub>7</sub> H <sub>14</sub> O <sub>2</sub> (n-pentyl acetate, n-butyl propionate, iso-butyl propionate, n-propyl n-butyrate, n-propyl iso-butyrate, iso-propyl iso-butyrate, ethyl n-pentanoate, methyl hexanoate) .....                                                                                                         | 60 |
| 7.6 | C <sub>8</sub> H <sub>16</sub> O <sub>2</sub> (n-pentyl acetate, n-butyl propionate, iso-butyl propionate, n-propyl n-butyrate, n-propyl iso-butyrate, iso-propyl iso-butyrate, ethyl n-pentanoate, methyl hexanoate) .....                                                                                                         | 62 |
| 7.7 | C <sub>9</sub> H <sub>18</sub> O <sub>2</sub> (m-pentyl n-butyrate, n-pentyl iso-butyrate, iso-butyl n-pentanoate) and C <sub>9</sub> H <sub>10</sub> O <sub>2</sub> (benzyl acetate) .....                                                                                                                                         | 64 |
| 7.8 | C <sub>20</sub> H <sub>38</sub> O <sub>4</sub> (dipentyl sebacate), C <sub>12</sub> H <sub>14</sub> O <sub>4</sub> (diethyl phthalate), C <sub>16</sub> H <sub>22</sub> O <sub>4</sub> (di-n-butyl phthalate), C <sub>24</sub> H <sub>38</sub> O <sub>4</sub> (di-2-ethylhexyl phthalate).....                                      | 65 |
| 8   | Multifunctional species.....                                                                                                                                                                                                                                                                                                        | 67 |
| 8.1 | C <sub>3</sub> H <sub>8</sub> O <sub>2</sub> (2-methoxy ethanol), C <sub>4</sub> H <sub>10</sub> O <sub>2</sub> (2-ethoxy ethanol), C <sub>4</sub> H <sub>10</sub> O <sub>3</sub> (diethyl glycol), C <sub>6</sub> H <sub>14</sub> O <sub>4</sub> (triethyl glycol), C <sub>6</sub> H <sub>14</sub> O <sub>3</sub> (dioxitol) ..... | 67 |
| 8.2 | C <sub>5</sub> H <sub>8</sub> O <sub>2</sub> (furdural), C <sub>6</sub> H <sub>12</sub> O <sub>2</sub> (4-hydroxyl-4-methyl-2-pentanone), C <sub>6</sub> H <sub>12</sub> O <sub>3</sub> (2-ethoxy ethyl acetate), C <sub>8</sub> H <sub>8</sub> O <sub>3</sub> (methyl salicylate).....                                             | 69 |
| 9   | N-containing species .....                                                                                                                                                                                                                                                                                                          | 71 |
| 9.1 | C <sub>4</sub> H <sub>11</sub> N (n-butylamine, iso-butylamine, and diethylamine), C <sub>2</sub> H <sub>8</sub> N <sub>2</sub> (ethyl diamine), C <sub>3</sub> H <sub>7</sub> NO (dimethyl formamide), C <sub>6</sub> H <sub>15</sub> N (triethylamine), C <sub>12</sub> H <sub>12</sub> N <sub>2</sub> (benzidine) .....          | 71 |
| 9.2 | C <sub>6</sub> H <sub>7</sub> N <sub>2</sub> (aniline), C <sub>6</sub> H <sub>5</sub> NO <sub>2</sub> (nitrobenzene).....                                                                                                                                                                                                           | 73 |

|                                                                                                                                                                                                                                                                                |    |
|--------------------------------------------------------------------------------------------------------------------------------------------------------------------------------------------------------------------------------------------------------------------------------|----|
| 9.3 HCN, C <sub>3</sub> H <sub>3</sub> N (acrylonitrile), C <sub>6</sub> H <sub>7</sub> NO <sub>2</sub> (ethyl cyanoacrylate), C <sub>7</sub> H <sub>5</sub> N (benzonitrile), C <sub>5</sub> H <sub>5</sub> N (pyridine), C <sub>5</sub> H <sub>11</sub> N (piperidine) ..... | 75 |
|--------------------------------------------------------------------------------------------------------------------------------------------------------------------------------------------------------------------------------------------------------------------------------|----|

# 1 Alkanes and cycloalkanes

## 1.1 CH<sub>4</sub> (methane), C<sub>2</sub>H<sub>6</sub> (ethane), and C<sub>3</sub>H<sub>8</sub> (propane)

Last evaluated: 10 July 2014

| Species               | Reference                  | <i>T</i> (K) | <i>D<sub>m</sub></i> ( <i>T</i> ) | <i>D<sub>m</sub></i> (298) | <i>D<sub>e</sub></i> ( <i>T</i> ) | ( <i>D<sub>e</sub></i> / <i>D<sub>m</sub></i> -1) (%) |
|-----------------------|----------------------------|--------------|-----------------------------------|----------------------------|-----------------------------------|-------------------------------------------------------|
| Methane               | Coward and Georgeson, 1937 | 273          | 149                               | 174                        | 138                               | -7                                                    |
|                       | Muller and Cahill, 1964    | 298          | 164                               | 164                        | 161                               | -2                                                    |
|                       |                            | 353          | 218                               |                            | 217                               | -1                                                    |
|                       |                            | 382          | 252                               |                            | 249                               | -1                                                    |
| Cowie and Watts, 1970 | 298                        | 165          | 165                               | 161                        | -2                                |                                                       |
| ethane                | Boyd et al., 1951          | 298          | 112                               | 112                        | 109                               | -3                                                    |
|                       | Elliott and Watts, 1972    | 298          | 116                               | 116                        | 109                               | -6                                                    |
| propane               | Barr and Watts, 1972       | 298          | 87                                | 87                         | 86                                | -1                                                    |

### Comments:

**methane:** The diffusivities of methane measured at 298 K by Muller and Cahill (1964) and Cowie and Watts (1970) agree well with that extrapolated to 298 K from that at 273 K measured by Coward and Georgeson (1937). The measured diffusivities by the three studies agree well with the estimated values using Fuller's method over 273-382 K.

**ethane:** The diffusivities of ethane measured at 298 K by Boyd et al. (1951) and Elliot and Watts (1972) agree well, and are only a few percentages larger than the estimated value using Fuller's method.

**propane:** Only one study (Barr and Watts, 1972) measured the diffusivity of propane (at 298 K), and the reported value is only 1% larger than the estimated value using Fuller's method.

### Preferred value in N<sub>2</sub> (or air/O<sub>2</sub>) at 298 K:

**methane:** (168±5) Torr cm<sup>2</sup> s<sup>-1</sup>

The preferred diffusivity of methane at 298 K, (168±5) Torr cm<sup>2</sup> s<sup>-1</sup>, is the average of those reported by Muller and Cahill (1965) at 298 K, Cowie and Watts (1970) at 298 K, and that extrapolated to 298 K from that measured at 273 K by Coward and Georgeson (1937).

**ethane:** (114±5) Torr cm<sup>2</sup> s<sup>-1</sup>

The preferred diffusivity of ethane at 298 K,  $(114\pm 5)$  Torr  $\text{cm}^2 \text{s}^{-1}$ , is the average of those reported at 298 K by Boyd et al. (1951) and Elliot and Watts (1972), and the given uncertainty reflects the difference between the preferred value and the estimated value using Fuller's method.

**propane:**  $(87\pm 5)$  Torr  $\text{cm}^2 \text{s}^{-1}$

The preferred diffusivity of propane at 298 K,  $(87\pm 5)$  Torr  $\text{cm}^2 \text{s}^{-1}$ , is based on that reported by Barr and Watts (1972). Though the relative difference between the measured and estimated values is only 1%, a 5% uncertainty is given to the preferred value.

[Last change in the preferred value: 10 July 2014](#)

### References:

- Barr, J. K., and Sawyer, D. T.: Studies of the Liquid Phase Mass-Transfer Term in Gas Chromatography, *Anal. Chem.*, 36, 1753-1759, 1964.
- Boyd, C. A., Stein, N., Steingrimsen, V., and Rumpel, W. F.: An Interferometric Method of Determining Diffusion Coefficients in Gaseous Systems, *J. Chem. Phys.*, 19, 548-553, 1951.
- Coward, H. F., and Georgeson, E. H. M.: The diffusion coefficient of methane and air, *J. Chem. Soc.*, 1085-1087, 1937.
- Cowie, M., and Watts, H.: Diffusion of Methane and Chloromethanes in Air, *Can. J. Chem.*, 49, 74-77, 1971.
- Elliott, R. W., and Watts, H.: Diffusion of some Hydrocarbons in Air: a Regularity in the Diffusion Coefficients of a Homologous Series, *Can. J. Chem.*, 50, 31-34, 1972.
- Muller, C. R., and Cahill, R. W.: Mass Spectrometric Measurement of Diffusion Coefficients, *J. Chem. Phys.*, 40, 651-654, 1964.

## 1.2 C<sub>4</sub>H<sub>10</sub> (butane, methyl propane)

Last evaluated: 10 July 2014

| Species        | Reference                 | T (K) | D <sub>m</sub> (T) | D <sub>m</sub> (298) | D <sub>e</sub> (T) | (D <sub>e</sub> /D <sub>m</sub> -1) (%) |
|----------------|---------------------------|-------|--------------------|----------------------|--------------------|-----------------------------------------|
| n-butane       | Boyd et al., 1951         | 298   | 73                 | 73                   | 74                 | 1                                       |
|                | Hargrove and Sawyer, 1967 | 298   | 73                 | 73                   | 74                 | 2                                       |
|                | Fuller et al., 1969       | 302   | 76                 | 74                   | 75                 | -1                                      |
|                | Elliott and Watts, 1972   | 298   | 78                 | 78                   | 75                 | -3                                      |
|                | Gotoh et al., 1974        | 298   | 77                 | 77                   | 75                 | -3                                      |
|                |                           |       | 378                | 121                  |                    | 112                                     |
|                |                           | 438   | 160                |                      | 144                | -10                                     |
| methyl propane | Boyd et al., 1951         | 298   | 69                 | 69                   | 74                 | 7                                       |
|                | Barr and Watts, 1972      | 298   | 73                 | 73                   | 74                 | 1                                       |

### Comments:

**n-butane:** The diffusivities measured at 298 K by Boyd et al. (1951), Hargrove and Sawyer (1967), Elliot and Watts (1972) and Gotoh et al. (1974) all agree well with that extrapolated to 298 K from that measured at 303 K by Fuller et al. (1969). The difference between the measured diffusivities and the estimated values over 298-438 K are not larger than 10%.

**methyl propane:** The diffusivities of methyl propane measured by the two studies (Boyd et al., 1951; Barr and Watts, 1972) at 298 K agree well, and are only a few percentages smaller than the estimated value using Fuller's method.

### Preferred value in N<sub>2</sub> (or air/O<sub>2</sub>) at 298 K:

**n-butane:** (75±3) Torr cm<sup>2</sup> s<sup>-1</sup>

The preferred diffusivity of n-butane, (75±3) Torr cm<sup>2</sup> s<sup>-1</sup>, is the average of those reported by all the studies at 298 K (or extrapolated to 298 K if the measurement was not carried out at 298 K).

**methyl propane:** (71±3) Torr cm<sup>2</sup> s<sup>-1</sup>

The preferred diffusivity of methyl propane, (71±3) Torr cm<sup>2</sup> s<sup>-1</sup>, is the average reported by Boyd et al. (1951) and Barr and Watts (1972).

Last change in the preferred value: 10 July 2014

### References:

- Barr, J. K., and Sawyer, D. T.: Studies of the Liquid Phase Mass-Transfer Term in Gas Chromatography, *Anal. Chem.*, 36, 1753-1759, 1964.
- Boyd, C. A., Stein, N., Steingrímsson, V., and Rumpel, W. F.: An Interferometric Method of Determining Diffusion Coefficients in Gaseous Systems, *J. Chem. Phys.*, 19, 548-553, 1951.
- Elliott, R. W., and Watts, H.: Diffusion of some Hydrocarbons in Air: a Regularity in the Diffusion Coefficients of a Homologous Series, *Can. J. Chem.*, 50, 31-34, 1972.
- Fuller, E. N., Ensley, K., and Giddings, J. C.: Diffusion of halogenated hydrocarbons in helium. The effect of structure on collision cross sections, *J. Phys. Chem.*, 73, 3679-3685, 1969.
- Gotoh, S., Manner, M., Sorensen, J. P., and Stewart, W. E.: Binary diffusion coefficients of low-density gases. I. Measurements by modified Loschmidt method, *J. Chem. Eng. Data*, 19, 169-171, 1974.
- Hargrove, G. L., and Sawyer, D. T.: Determination of gaseous interdiffusion coefficients for solute vapor-carrier gas pairs, *Anal. Chem.*, 39, 244-246, 1967.
- Muller, C. R., and Cahill, R. W.: Mass Spectrometric Measurement of Diffusion Coefficients, *J. Chem. Phys.*, 40, 651-654, 1964.



### 1.3 C<sub>5</sub>H<sub>12</sub> (n-pentane, methyl butane, dimethyl butane)

Last evaluated: 10 July 2014

| Species          | Reference               | T (K) | D <sub>m</sub> (T) | D <sub>m</sub> (298) | D <sub>e</sub> (T) | (D <sub>e</sub> /D <sub>m</sub> -1) (%) |
|------------------|-------------------------|-------|--------------------|----------------------|--------------------|-----------------------------------------|
| n-pentane        | Lugg, 1968              | 298   | 64                 | 64                   | 65                 | 2                                       |
|                  | Arnikar and Ghule, 1969 | 353   | 103                | 77                   | 88                 | -15                                     |
|                  | Barr and Watts, 1972    | 298   | 65                 | 65                   | 65                 | 0                                       |
|                  | Nagasaka, 1973          | 258   | 51                 |                      | 51                 | -1                                      |
|                  |                         | 263   | 53                 |                      | 52                 | -3                                      |
|                  |                         | 268   | 56                 |                      | 54                 | -3                                      |
|                  |                         | 273   | 57                 |                      | 56                 | -2                                      |
|                  |                         | 278   | 59                 |                      | 58                 | -1                                      |
|                  |                         | 283   | 61                 |                      | 59                 | -3                                      |
|                  |                         | 288   | 63                 |                      | 61                 | -3                                      |
| 293              | 65                      |       | 63                 | -3                   |                    |                                         |
| 298              | 67                      |       | 67                 | 65                   | -2                 |                                         |
| methyl butane    | Elliott and Watts, 1972 | 298   | 71                 | 71                   | 65                 | -9                                      |
| dimethyl propane | Elliott and Watts, 1972 | 298   | 67                 | 67                   | 65                 | -2                                      |

#### Comments:

**n-pentane:** The diffusivities of n-pentane at 298 K reported by Lugg (1968), Barr and Watts (1972), Nagasaka (1973) are in good agreement. The differences between the reported diffusivities reported by these three studies and the estimated values using Fuller's method are <5%. Arnikar and Ghule (1969) measured its diffusivity at 353 K, 15% larger than the estimated value, and if extrapolated to 298 K, it is significantly larger than those reported by the other three studies. This may suggest that the value reported by Arnikar and Ghule (1969) is not reliable.

**methyl butane:** The diffusivity of methyl butane measured at 298 K by Elliott and Watts (1972) is 9% larger than the estimated value.

**dimethyl propane:** The diffusivity of dimethyl propane measured at 298 K by Elliott and Watts (1972) is 2% larger than the estimated value.

#### Preferred value in N<sub>2</sub> (or air/O<sub>2</sub>) at 298 K:

**n-pentane:** (65±2) Torr cm<sup>2</sup> s<sup>-1</sup>

The preferred diffusivity of n-pentane, (65±2) Torr cm<sup>2</sup> s<sup>-1</sup>, is the average of those reported by Lugg (1968), Barr and Watts (1972), and Nagasaka (1973).

**methyl butane:**  $(71\pm 6)$  Torr  $\text{cm}^2 \text{s}^{-1}$

The preferred diffusivity of methyl butane,  $(71\pm 6)$  Torr  $\text{cm}^2 \text{s}^{-1}$ , is based on the value reported by Elliott and Watts (1972), and the given uncertainty reflects the difference between the measured and estimated diffusivities.

**dimethyl propane:**  $(67\pm 2)$  Torr  $\text{cm}^2 \text{s}^{-1}$

The preferred diffusivity of dimethyl propane,  $(71\pm 6)$  Torr  $\text{cm}^2 \text{s}^{-1}$ , is based on the value reported by Elliott and Watts (1972), and the given uncertainty reflects the difference between the measured and estimated diffusivities.

[Last change in the preferred value: 10 July 2014](#)

#### **References:**

- Arnikar, H. J., and Ghule, H. M.: Electrodeless discharge as detector in the rapid determination of binary diffusion coefficient of gases, *Int. J. Electronics.*, 26, 159-162, 1969.
- Barr, J. K., and Sawyer, D. T.: Studies of the Liquid Phase Mass-Transfer Term in Gas Chromatography, *Anal. Chem.*, 36, 1753-1759, 1964.
- Elliott, R. W., and Watts, H.: Diffusion of some Hydrocarbons in Air: a Regularity in the Diffusion Coefficients of a Homologous Series, *Can. J. Chem.*, 50, 31-34, 1972.
- Lugg, G. A.: Diffusion coefficients of some organic and other vapors in air, *Anal. Chem.*, 40, 1072-1077, 1968.
- Nagasaka, M.: Binary diffusion coefficients of n-pentane in gases, *J. Chem. Eng. Data.*, 18, 388-390, 1973.

## 1.4 C<sub>6</sub>H<sub>14</sub> (n-hexane, 2,3-dimethyl butane)

Last evaluated: 10 July 2014

| Species                 | Reference                    | T (K) | D <sub>m</sub> (T) | D <sub>m</sub> (298) | D <sub>e</sub> (T) | (D <sub>e</sub> /D <sub>m</sub> -1) (%) |
|-------------------------|------------------------------|-------|--------------------|----------------------|--------------------|-----------------------------------------|
| n-hexane                | Cummings and Ubbelohde, 1953 | 289   | 58                 | 61                   | 56                 | -3                                      |
|                         |                              | 298   | 61                 | 61                   | 59                 | -3                                      |
|                         | Altshuller and Cohen, 1960   | 303   | 62                 |                      | 61                 | -1                                      |
|                         |                              | 322   | 69                 |                      | 67                 | -2                                      |
|                         | Lugg, 1968                   | 298   | 56                 | 56                   | 59                 | 6                                       |
| Arnikar and Ghule, 1969 | 353                          | 133   | 99                 | 79                   | -41                |                                         |
| 2,3-dimethyl butane     | Cummings and Ubbelohde, 1953 | 289   | 57                 | 60                   | 56                 | -2                                      |

### Comments:

**n-hexane:** The diffusivities measured at 298 K by Altshuller and Cohen (1960) and Lugg (1968) agree well, and are also in good agreement with that extrapolated to 298 K from that measured at 289 K by Cummings and Ubbelohde (1953). The difference between the diffusivities measured by these three studies and the estimated values is not larger than 6%. Arnikar and Ghule (1969) measured the diffusivity at 353 K, 41% larger than the estimated value using Fuller's method, and if extrapolated to 298 K, it is >50% larger than those reported by the other three studies. This may suggest that the value reported by Arnikar and Ghule (1969) is not reliable.

**2,3-dimethyl butane:** The diffusivity measured at 289 K by Cummings and Ubbelohde (1953) shows excellent agreement with the estimated value.

### Preferred value in N<sub>2</sub> (or air/O<sub>2</sub>) at 298 K:

**n-hexane:** (59±3) Torr cm<sup>2</sup> s<sup>-1</sup>

The preferred diffusivity of n-hexane, (59±3) Torr cm<sup>2</sup> s<sup>-1</sup>, is the average of those reported by Cummings and Ubbelohde (1953), Altshuller and Coehn (1960) and Lugg (1968) at 298 K (or extrapolated to 298 K if the measurement was not carried out at 298 K).

**2,3-dimethyl butane:** (60±2) Torr cm<sup>2</sup> s<sup>-1</sup>

The preferred diffusivity of 2,3-dimethyl butane, (60±2) Torr cm<sup>2</sup> s<sup>-1</sup>, is extrapolated to 298 K from the measurement of Cummings and Ubbelohde (1953) at 289 K. The given

uncertainty reflects the normalized difference between the measured and estimated diffusivities at 289 K.

[Last change in the preferred value: 10 July 2014](#)

**References:**

Altshuller, A. P., and Cohen, I. R.: Application of Diffusion Cells to Production of Known Concentration of Gaseous Hydrocarbons, *Anal. Chem.*, 32, 802-810, 1960.

Arnikar, H. J., and Ghule, H. M.: Electrodeless discharge as detector in the rapid determination of binary diffusion coefficient of gases, *Int. J. Electronics.*, 26, 159-162, 1969.

Cummings, G. A. M., and Ubbelohde, A. R.: Collision diameters of flexible hydrocarbon molecules in the vapour phase : the "hydrogen effect.", *J. Chem. Soc.*, 3751-3755, 1953.

Lugg, G. A.: Diffusion coefficients of some organic and other vapors in air, *Anal. Chem.*, 40, 1072-1077, 1968.

## 1.5 C<sub>7</sub>H<sub>16</sub> (n-heptane, 2,4-dimethyl pentane)

Last evaluated: 10 July 2014

| Species              | Reference                  | T (K)      | D <sub>m</sub> (T) | D <sub>m</sub> (298) | D <sub>e</sub> (T) | (D <sub>e</sub> /D <sub>m</sub> -1) (%) |
|----------------------|----------------------------|------------|--------------------|----------------------|--------------------|-----------------------------------------|
| n-heptane            | Cummings et al., 1955      | 303        | 56                 | 55                   | 56                 | -1                                      |
|                      | Clarke and Ubbelohde, 1957 | 303        | 56                 | 55                   | 56                 | 0                                       |
|                      | Altshuller and Cohen, 1960 | 290<br>338 | 54<br>64           | 56                   | 52<br>68           | -3<br>6                                 |
| 2,4-dimethyl pentane | Clarke and Ubbelohde, 1957 | 303        | 57                 | 55                   | 56                 | -1                                      |

### Comments:

**n-heptane:** The measured diffusivities (Cummings et al., 1955; Clarke and Ubbelohde, 1957; Altshuller and Cohen) over 290-338 K show excellent agreement with the estimated values. If extrapolated to 298 K, all three studies agree well with each other.

**2,4-dimethyl pentane:** The only measurement by Clarke and Ubbelohde (1957) shows excellent agreement with the estimation.

### Preferred value in N<sub>2</sub> (or air/O<sub>2</sub>) at 298 K:

**n-heptane:** (55±2) Torr cm<sup>2</sup> s<sup>-1</sup>

The preferred diffusivity of n-heptane, (59±2) Torr cm<sup>2</sup> s<sup>-1</sup>, is the average of those extrapolated to 298 K from those measured at 303 K by Cummings et al. (1955) and Clarke and Ubbelohde (1957) and at 290 K by Altshuller and Cohen (1960). The given uncertainty reflects the difference between the measurement and estimation.

**2,4-dimethyl pentane:** (55±2) Torr cm<sup>2</sup> s<sup>-1</sup>

The measurement by Clark and Ubbelohde (1957) at 303 K is preferred, and it gives a value of 55 Torr cm<sup>2</sup> s<sup>-1</sup> after being extrapolated to 298 K.

Last change in the preferred value: 10 July 2014

### References:

- Altshuller, A. P., and Cohen, I. R.: Application of Diffusion Cells to Production of Known Concentration of Gaseous Hydrocarbons, *Anal. Chem.*, 32, 802-810, 1960.
- Clarke, J. K., and Ubbelohde, A. R.: Isotope effects in diffusion cross-sections for flexible hydrocarbons, *J. Chem. Soc.*, 2050-2055, 1957.

Cummings, G. A. M., McLaughlin, E., and Ubbelohde, A. R.: Collision parameters of C6-C9 hydrocarbons in the vapour phase: the hydrogen effect, *J. Chem. Soc.*, 1141-1144, 1955.

## 1.6 C<sub>8</sub>H<sub>18</sub> (n-octane, 2,2,4-trimethyl pentane)

Last evaluated: 10 July 2014

| Species                 | Reference                    | T (K) | D <sub>m</sub> (T) | D <sub>m</sub> (298) | D <sub>e</sub> (T) | (D <sub>e</sub> /D <sub>m</sub> -1) (%) |
|-------------------------|------------------------------|-------|--------------------|----------------------|--------------------|-----------------------------------------|
| n-octane                | Mack, 1925                   | 298   | 46                 | 46                   | 50                 | 9                                       |
|                         | Cummings and Ubbelohde, 1953 | 303   | 54                 | 52                   | 52                 | -4                                      |
|                         | Clarke and Ubbelohde, 1957   | 303   | 55                 | 54                   | 52                 | -6                                      |
|                         | Lugg, 1968                   | 298   | 47                 | 47                   | 50                 | 7                                       |
| 2,2,4-trimethyl pentane | Cummings and Ubbelohde, 1953 | 303   | 54                 | 53                   | 52                 | -4                                      |
|                         | Clarke and Ubbelohde, 1957   | 303   | 54                 | 53                   | 52                 | -3                                      |

### Comments:

**n-octane:** The measured diffusivities at 298 K by the two studies (Mack, 1925; Lugg, 1968) agree well. The other two studies (Cummings and Ubbelohde, 1953; Clarke and Ubbelohde) measured it at 303 K, and the reported values, after being extrapolated to 298 K, show good agreement with these reported by Mack (1925) and Lugg (1968). The differences between the measured and estimated diffusivities at 298 and 303 K are <10%.

**2,2,4-trimethyl pentane:** The measured diffusivities at 303 K, reported by Cummings and Ubbelohde (1953) and Clarke and Ubbelohde (1957) are in good agreement, and are only 4% different from the estimated values using Fuller's method.

### Preferred value in N<sub>2</sub> (or air/O<sub>2</sub>) at 298 K:

**n-octane:** (50±4) Torr cm<sup>2</sup> s<sup>-1</sup>

The preferred diffusivity of n-octane at 298 K, (50±4) Torr cm<sup>2</sup> s<sup>-1</sup>, is the average of these reported by all the four studies (extrapolated to 298 K if the measurement was not performed at 298 K).

**2,2,4-trimethyl pentane:** (53±2) Torr cm<sup>2</sup> s<sup>-1</sup>

The preferred diffusivity of n-2,2,4-trimethyl pentane at 298 K, (53±2) Torr cm<sup>2</sup> s<sup>-1</sup>, is based on the values measured by Cummings and Ubbelohde (1953) and Clarke and Ubbelohde (1957). The given uncertainty reflects the difference between the measurement and estimation.

Last change in the preferred value: 10 July 2014

**References:**

- Clarke, J. K., and Ubbelohde, A. R.: Isotope effects in diffusion cross-sections for flexible hydrocarbons, *J. Chem. Soc.*, 2050-2055, 1957.
- Cummings, G. A. M., McLaughlin, E., and Ubbelohde, A. R.: Collision parameters of C6-C9 hydrocarbons in the vapour phase: the hydrogen effect, *J. Chem. Soc.*, 1141-1144, 1955.
- Lugg, G. A.: Diffusion coefficients of some organic and other vapors in air, *Anal. Chem.*, 40, 1072-1077, 1968.
- Mack, E.: Average cross-sectional areas of molecules by gaseous diffusion methods, *J. Am. Chem. Soc.*, 47, 2468-2482, 1925.



## 1.7 C<sub>9</sub>H<sub>20</sub> (n-nonane), C<sub>10</sub>H<sub>22</sub> (n-decane, 2,3,3-trimethyl heptane) and C<sub>12</sub>H<sub>26</sub> (n-dodecane)

Last evaluated: 11 July 2014

| Species                 | Reference                    | T (K)                      | D <sub>m</sub> (T) | D <sub>m</sub> (298) | D <sub>e</sub> (T) | (D <sub>e</sub> /D <sub>m</sub> -1) (%) |   |
|-------------------------|------------------------------|----------------------------|--------------------|----------------------|--------------------|-----------------------------------------|---|
| n-nonane                | Cummings et al., 1955        | 340                        | 56                 | 44                   | 60                 | 7                                       |   |
| n-decane                | Cummings and Ubbelohde, 1953 | 364                        | 64                 | 45                   | 64                 | 0                                       |   |
|                         |                              | Altshuller and Cohen, 1960 | 313                | 46                   | 42                 | 49                                      | 6 |
|                         |                              | 334                        | 52                 |                      | 55                 | 5                                       |   |
|                         |                              | 357                        | 59                 |                      | 61                 | 4                                       |   |
|                         |                              | 391                        | 66                 |                      | 72                 | 10                                      |   |
|                         |                              | 422                        | 71                 |                      | 82                 | 16                                      |   |
| 2,3,3-trimethyl heptane | Cummings and Ubbelohde, 1953 | 303                        | 54                 | 52                   | 46                 | -14                                     |   |
| n-dodecane              | Cummings and Ubbelohde, 1953 | 399                        | 62                 | 37                   | 68                 | 10                                      |   |

### Comments:

**n-nonane:** The diffusivity of n-nonane was measured only measured by one study (Cummings et al., 1955) at 340 K, and the agreement with the estimated value is good.

**n-decane:** Both studies (Cummings and Ubbelohde, 1953; Altshuller and Cohen, 1960) were carried out above 310 K. The measured diffusivities over 313-422 K agree well with the estimated values, though it appears that the difference becomes larger at higher temperature. If extrapolated to 298 K, the two measurements show good agreement.

**2,3,3-trimethyl heptane:** The diffusivity of 2,3,3-trimethyl heptane was only measured by one study (Cummings and Ubbelohde, 1953) at 309 K, and the reported value is 14% larger than the estimated one.

**n-dodecane:** The diffusivity of n-dodecane was only measured by one study (Cummings and Ubbelohde, 1953) at 399 K, and the reported value is 10% lower than the estimated one.

### Preferred value in N<sub>2</sub> (or air/O<sub>2</sub>) at 298 K:

**n-nonane:** (44±4) Torr cm<sup>2</sup> s<sup>-1</sup>

The diffusivity of n-nonane, measured by Cumming et al. (1955) at 340 K, (56±4) Torr cm<sup>2</sup> s<sup>-1</sup>, is preferred. It gives a value of (44±4) Torr cm<sup>2</sup> s<sup>-1</sup> when extrapolated

to 298 K. The given uncertainty reflects the difference between the measurement and estimation.

**n-decane:**  $(44\pm 2)$  Torr  $\text{cm}^2 \text{s}^{-1}$

The preferred value,  $(44\pm 2)$  Torr  $\text{cm}^2 \text{s}^{-1}$ , is the average of those extrapolated to 298 K from those measured at 364 K by Cummings and Ubbelohde (1953) and at 313 K by Altshuller and Cohen (1960).

**2,3,3-trimethyl heptane:**  $(52\pm 8)$  Torr  $\text{cm}^2 \text{s}^{-1}$

The measurement by Cummings and Ubbelohde (1953) is preferred, giving recommended values of  $(54\pm 8)$  Torr  $\text{cm}^2 \text{s}^{-1}$  at 303 K and  $(52\pm 8)$  Torr  $\text{cm}^2 \text{s}^{-1}$  at 298 K. The given uncertainty reflects the difference between the measurement and estimation.

**n-dodecane:**  $(37\pm 4)$  Torr  $\text{cm}^2 \text{s}^{-1}$

The measurement by Cummings and Ubbelohde (1953) is preferred, giving recommended values of  $(62\pm 7)$  Torr  $\text{cm}^2 \text{s}^{-1}$  at 399 K and  $(37\pm 4)$  Torr  $\text{cm}^2 \text{s}^{-1}$  at 298 K.

[Last change in the preferred value: 11 July 2014](#)

#### **References:**

- Altshuller, A. P., and Cohen, I. R.: Application of Diffusion Cells to Production of Known Concentration of Gaseous Hydrocarbons, *Anal. Chem.*, 32, 802-810, 1960.
- Cummings, G. A. M., McLaughlin, E., and Ubbelohde, A. R.: Collision parameters of C6-C9 hydrocarbons in the vapour phase: the hydrogen effect, *J. Chem. Soc.*, 1141-1144, 1955.
- Cummings, G. A. M., and Ubbelohde, A. R.: Collision diameters of flexible hydrocarbon molecules in the vapour phase : the "hydrogen effect.", *J. Chem. Soc.*, 3751-3755, 1953.

## 1.8 C<sub>16</sub>H<sub>34</sub> (n-hexadecane), C<sub>17</sub>H<sub>36</sub> (n-heptadecane) and C<sub>18</sub>H<sub>38</sub> (n-octadecane)

Last evaluated: 11 July 2014

| Species       | Reference                  | T (K) | D <sub>m</sub> (T) | D <sub>m</sub> (298) | D <sub>e</sub> (T) | (D <sub>e</sub> /D <sub>m</sub> -1) (%) |
|---------------|----------------------------|-------|--------------------|----------------------|--------------------|-----------------------------------------|
| n-hexadecane  | Bradley and Shellard, 1949 | 288   | 29                 |                      | 33                 | 13                                      |
|               |                            | 290   | 30                 |                      | 33                 | 11                                      |
|               |                            | 293   | 30                 |                      | 34                 | 14                                      |
|               |                            | 298   | 31                 | 31                   | 35                 | 15                                      |
|               |                            | 303   | 32                 |                      | 36                 | 11                                      |
|               |                            | 308   | 33                 |                      | 37                 | 12                                      |
| n-heptadecane | Bradley and Shellard, 1949 | 288   | 31                 |                      | 32                 | 4                                       |
|               |                            | 293   | 32                 |                      | 33                 | 3                                       |
|               |                            | 298   | 32                 | 32                   | 34                 | 6                                       |
|               |                            | 303   | 33                 |                      | 35                 | 6                                       |
|               |                            | 308   | 34                 |                      | 36                 | 5                                       |
|               |                            | 313   | 35                 |                      | 37                 | 5                                       |
| n-octadecane  | Bradley and Shellard, 1949 | 288   | 29                 |                      | 31                 | 5                                       |
|               |                            | 293   | 30                 |                      | 32                 | 6                                       |
|               |                            | 298   | 32                 | 32                   | 33                 | 4                                       |
|               |                            | 303   | 31                 |                      | 34                 | 10                                      |
|               |                            | 308   | 32                 |                      | 35                 | 9                                       |
|               |                            | 313   | 35                 |                      | 36                 | 4                                       |

### Comments:

**n-hexadecane, n-heptadecane, n-octadecane:** The diffusivities of n-hexadecane, n-heptadecane and n-octadecane were only measured by one study (Bradley and Shellard, 1949) over 299-313 K. The differences between the measurements and estimations are usually <15%.

### Preferred value in N<sub>2</sub> (or air/O<sub>2</sub>) at 298 K:

**n-hexadecane:** (31±5) Torr cm<sup>2</sup> s<sup>-1</sup>

**n-heptadecane:** (32±5) Torr cm<sup>2</sup> s<sup>-1</sup>

**n-octadecane:** (32±5) Torr cm<sup>2</sup> s<sup>-1</sup>

The preferred diffusivities of n-hexadecane, n-heptadecane and n-octadecane are based on the measurements at 298 K by Bradley and Shellard (1949). The given uncertainties reflects the difference between the measurement (Bradley and Shellard, 1949) and the estimation over the temperature range investigated by Bradley and Shellard (1949).

Last change in the preferred value: 11 July 2014

**References:**

Bradley, R. S., and Shellard, A. D.: The Rate of Evaporation of Droplets. III. Vapour Pressures and Rates of Evaporation of Straight-Chain Paraffin Hydrocarbons, *Proc. Roy. Soc. A*, 198, 239-251, 1949.

## 1.9 C<sub>3</sub>H<sub>6</sub> (cyclopropane), C<sub>5</sub>H<sub>10</sub> (cyclopentane) and C<sub>6</sub>H<sub>12</sub> (cyclohexane, methyl cyclopentane)

Last evaluated: 11 July 2014

| Species             | Reference                    | <i>T</i> (K) | <i>D<sub>m</sub></i> (T) | <i>D<sub>m</sub></i> (298) | <i>D<sub>e</sub></i> (T) | ( <i>D<sub>e</sub></i> / <i>D<sub>m</sub></i> -1) (%) |
|---------------------|------------------------------|--------------|--------------------------|----------------------------|--------------------------|-------------------------------------------------------|
| cyclopropane        | Elliott and Watts, 1972      | 298          | 97                       | 97                         | 90                       | -7                                                    |
| cyclopentane        | Elliott and Watts, 1972      | 298          | 70                       | 70                         | 62                       | -11                                                   |
| cyclohexane         | Cummings and Ubbelohde, 1953 | 289          | 58                       | 61                         | 57                       | -1                                                    |
|                     | Hudson et al., 1960          | 289          | 57                       | 60                         | 57                       | 1                                                     |
|                     | Nagata and Hasegawa, 1970    | 363          | 94                       | 67                         | 85                       | -10                                                   |
|                     |                              | 383          | 102                      |                            | 93                       | -9                                                    |
|                     |                              | 403          | 113                      |                            | 102                      | -10                                                   |
| methyl cyclopentane | Cummings and Ubbelohde, 1953 | 286          | 58                       | 62                         | 56                       | -3                                                    |

### Comments:

**cyclopropane and cyclopentane:** The diffusivities of cyclopropane and cyclopentane were measured at 298 K by Elliott and Watts (1972), and the measurements agree well with estimation.

**cyclohexane:** The diffusivities of cyclohexane were measured at 289 K by Cummings and Ubbelohde (1953) and Hudson et al. (1960) and over 363-403 K by Nagata and Hasegawa (1970). All the measurements agree well with estimation. If extrapolated to 298 K, the measurements by the three studies show good agreement.

**methyl cyclopentane:** The diffusivity of methyl cyclopentane was only measured by one study (Cummings and Ubbelohde, 1953) at 286 K, and the reported value agrees very well with the estimated one.

### Preferred value in N<sub>2</sub> (or air/O<sub>2</sub>) at 298 K:

**cyclopropane:** (97±7) Torr cm<sup>2</sup> s<sup>-1</sup>

**cyclopentane:** (70±8) Torr cm<sup>2</sup> s<sup>-1</sup>

The measured diffusivities of cyclopropane and cyclopentane at 298 K by Elliott and Watts (1972) are preferred. The given uncertainties reflect the differences between the measurements and estimations.

**cyclohexane:** (63±4) Torr cm<sup>2</sup> s<sup>-1</sup>

The preferred diffusivity of cyclohexane, is the average of those extrapolated to 298 K of those measured at 289 K by Cummings and Ubbelohde (1953) and Hudson et al. (1960) and at 363 K by Nagata and Hasegawa (1970).

**methyl cyclopentane:**  $(62\pm 2)$  Torr  $\text{cm}^2 \text{s}^{-1}$

The measurement by Cummings and Ubbelohde (1953) is preferred. The recommended diffusivities are  $(58\pm 2)$  Torr  $\text{cm}^2 \text{s}^{-1}$  at 286 K and thus  $(62\pm 2)$  Torr  $\text{cm}^2 \text{s}^{-1}$  at 298 K. The given uncertainties reflects the difference between the measurement and estimation.

[Last change in the preferred value: 11 July 2014](#)

#### **References:**

Clarke, J. K., and Ubbelohde, A. R.: Isotope effects in diffusion cross-sections for flexible hydrocarbons, *J. Chem. Soc.*, 2050-2055, 1957.

Elliott, R. W., and Watts, H.: Diffusion of some Hydrocarbons in Air: a Regularity in the Diffusion Coefficients of a Homologous Series, *Can. J. Chem.*, 50, 31-34, 1972.

Hudson, G. H., McCoubrey, J. C., and Ubbelohde, A. R.: Vapour diffusion coefficients and collision parameters for cyclic molecules, *Trans. Faraday Soc.*, 56, 1144-1151, 1960.

Nagata, I., and Hasegawa, T.: Gaseous interdiffusion coefficients, *J. Chem. Eng. Japan*, 3, 143-145, 1970.

## 2 Alkenes and alkynes

### 2.1 C<sub>2</sub>H<sub>4</sub> (ethene) and C<sub>3</sub>H<sub>6</sub> (propene)

Last evaluated: 11 July 2014

| Species                 | Reference                 | <i>T</i> (K) | <i>D<sub>m</sub></i> (T) | <i>D<sub>m</sub></i> (298) | <i>D<sub>e</sub></i> (T) | ( <i>D<sub>e</sub></i> / <i>D<sub>m</sub></i> -1) (%) |
|-------------------------|---------------------------|--------------|--------------------------|----------------------------|--------------------------|-------------------------------------------------------|
| ethene                  | Boyd et al., 1951         | 298          | 124                      | 124                        | 115                      | -7                                                    |
|                         | Knox and McLaren,<br>1964 | 291          | 124                      | 129                        | 110                      | -11                                                   |
|                         | Muller and Cahill, 1964   | 298          | 129                      | 129                        | 115                      | -11                                                   |
|                         |                           | 373          | 192                      |                            | 170                      | -12                                                   |
|                         | Evans and Kenney, 1965    | 287          | 109                      | 117                        | 108                      | -1                                                    |
|                         |                           | 291          | 114                      | 119                        | 110                      | -3                                                    |
|                         | Fuller et al., 1969       | 303          | 129                      | 125                        | 118                      | -9                                                    |
| Elliott and Watts, 1972 | 298                       | 126          | 126                      | 115                        | -9                       |                                                       |
| propene                 | Elliott and Watts, 1972   | 298          | 100                      | 100                        | 90                       | -10                                                   |

#### Comments:

**ethene:** The diffusivities of ethene were measured over 287-373 K (Boyd et al., 1951; Knox and McLaren, 1964; Muller and Cahill, 1964; Evans and Kenney, 1965; Fuller et al., 1969; Elliott and Watts, 1972), and the differences between the measured and estimated diffusivities are not larger than 12%. If extrapolated to 298 K, all the five measurements agree well.

**propene:** The diffusivity of propene was only measured by one study (Elliott and Watts, 1972) at 298 K, and the difference between the measured and estimated diffusivities is ~10%.

#### Preferred value in N<sub>2</sub> (or air/O<sub>2</sub>) at 298 K:

**ethene:** (124±5) Torr cm<sup>2</sup> s<sup>-1</sup>

The preferred diffusivity of ethene at 298 K, (124±5) Torr cm<sup>2</sup> s<sup>-1</sup>, is the average of those measured at or extrapolated to this temperature by all the five studies (Boyd et al., 1951; Knox and McLaren, 1964; Muller and Cahill, 1964; Evans and Kenney, 1965; Fuller et al., 1969; Elliott and Watts, 1972).

**propene:** (100±10) Torr cm<sup>2</sup> s<sup>-1</sup>

The measurement at 298 K by Elliott and Watts (1972) is preferred, and the given uncertainty reflects the difference between the measured and estimated diffusivities.

Last change in the preferred value: 11 July 2014

**References:**

- Boyd, C. A., Stein, N., Steingrimsón, V., and Rumpel, W. F.: An Interferometric Method of Determining Diffusion Coefficients in Gaseous Systems, *J. Chem. Phys.*, 19, 548-553, 1951.
- Elliott, R. W., and Watts, H.: Diffusion of some Hydrocarbons in Air: a Regularity in the Diffusion Coefficients of a Homologous Series, *Can. J. Chem.*, 50, 31-34.
- Evans, E. V., and Kenney, C. N.: Gaseous Dispersion in Laminar Flow Through a Circular Tube, *Proc. Roy. Soc. A*, 284, 540-550, 1965.
- Fuller, E. N., Ensley, K., and Giddings, J. C.: Diffusion of halogenated hydrocarbons in helium. The effect of structure on collision cross sections, *J. Phys. Chem.*, 73, 3679-3685, 1969.
- Knox, J. H., and McLaren, L.: A New Gas Chromatographic Method for Measuring Gaseous Diffusion Coefficients and Obstructive Factors, *Anal. Chem.*, 36, 1477-1482, 1964.
- Muller, C. R., and Cahill, R. W.: Mass Spectrometric Measurement of Diffusion Coefficients, *J. Chem. Phys.*, 40, 651-654, 1964.



## 2.2 C<sub>4</sub>H<sub>8</sub> (1-butene, cis-2-butene, trans-2-butene, 2-methyl propene)

Last evaluated: 11 July 2014

| Species          | Reference               | T (K) | D <sub>m</sub> (T) | D <sub>m</sub> (298) | D <sub>e</sub> (T) | (D <sub>e</sub> /D <sub>m</sub> -1) (%) |
|------------------|-------------------------|-------|--------------------|----------------------|--------------------|-----------------------------------------|
| 1-butene         | Elliott and Watts, 1972 | 298   | 83                 | 83                   | 76                 | -8                                      |
| cis-2-butene     | Elliott and Watts, 1972 | 298   | 83                 | 83                   | 76                 | -8                                      |
| trans-2-butene   | Elliott and Watts, 1972 | 298   | 86                 | 86                   | 76                 | -12                                     |
| 2-methyl propene | Elliott and Watts, 1972 | 298   | 81                 | 81                   | 76                 | -7                                      |

### Comments:

**1-butene, cis-2-butene, trans-2-butene, and 2-methyl propene:** The diffusivities of 1-butene and its other three isomers were measured by one study (Elliott and Watts, 1972) at 298 K, and the differences between the measured and estimated diffusivities are typically ~10%.

### Preferred value in N<sub>2</sub> (or air/O<sub>2</sub>) at 298 K:

**1-butene, cis-2-butene, trans-2-butene, and 2-methyl propene:** (83±10) Torr cm<sup>2</sup> s<sup>-1</sup>

The preferred diffusivities are based on the measurement by Elliott and Watts (1972). A single preferred value is given to all the four isomers, equal to the average of measured diffusivities of these four compounds, and the given uncertainty (±12%) reflect the difference between the measurement and estimation.

Last change in the preferred value: 11 July 2014

### References:

Elliott, R. W., and Watts, H.: Diffusion of some Hydrocarbons in Air: a Regularity in the Diffusion Coefficients of a Homologous Series, *Can. J. Chem.*, 50, 31-34.

## 2.3 C<sub>5</sub>H<sub>10</sub> (1-pentene), C<sub>6</sub>H<sub>12</sub> (1-hexene, 2-3-dimethyl-2-butene), C<sub>8</sub>H<sub>16</sub> (1-octene)

Last evaluated: 11 July 2014

| Species               | Reference                  | T (K) | D <sub>m</sub> (T) | D <sub>m</sub> (298) | D <sub>e</sub> (T) | (D <sub>e</sub> /D <sub>m</sub> -1) (%) |
|-----------------------|----------------------------|-------|--------------------|----------------------|--------------------|-----------------------------------------|
| 1-pentene             | Elliott and Watts, 1972    | 298   | 73                 | 73                   | 67                 | -8                                      |
| 1-hexene              | Altshuller and Cohen, 1960 | 293   | 60                 | 62                   | 58                 | -3                                      |
| 2,3-dimethyl-2-butene | Cummings et al., 1955      | 288   | 57                 | 60                   | 57                 | 0                                       |
| 1-octene              | Altshuller and Cohen, 1960 | 313   | 54                 | 49                   | 56                 | 4                                       |

### Comments:

**1-pentene:** The diffusivity of 1-pentene was measured by one study (Elliott and Watts, 1972) at 298 K, and the reported value is 8% larger than the estimated one.

**1-hexene and 2,3-dimethyl-2-butane:** The diffusivity of 1-hexene was measured by Altshuller and Cohen (1960) at 293 K and that of 2,3-dimethyl-2-butene was measured by Cummings et al. (1955) at 288 K. Both measurements show excellent agreement with the estimations.

**1-octene:** The diffusivity of 1-octene was measured at 313 K by Altshuller and Cohen (1960), and the measured value is 4% lower than the estimated one.

### Preferred value in N<sub>2</sub> (or air/O<sub>2</sub>) at 298 K:

**1-pentene:** (73±6) Torr cm<sup>2</sup> s<sup>-1</sup>

The preferred diffusivity of 1-pentene, (73±6) Torr cm<sup>2</sup> s<sup>-1</sup>, is based on the measurement by Elliott and Watts (1972), and the given uncertainty reflects the difference between the measured and estimated values.

**1-hexene and 2,3-dimethyl-2-butene:** (61±2) Torr cm<sup>2</sup> s<sup>-1</sup>

A single preferred diffusivity at 298 K, (61±2) Torr cm<sup>2</sup> s<sup>-1</sup>, is given to both 1-hexene and 2,3-dimethyl-2-butene. It is the average of those extrapolated to 298 K from that measured at 293 K for 1-hexene by Altshuller and Cohen (1960) and at 288 K for 2,3-dimethyl-2-butene by Cummings et al. (1955).

**1-octene:** (49±2) Torr cm<sup>2</sup> s<sup>-1</sup>

The preferred diffusivity of 1-octene, is based on the measurement at 313 K by Altshuller and Cohen (1960), extrapolated to 298 K. The given uncertainty reflects the difference between the measured and estimated diffusivities.

[Last change in the preferred value: 11 July 2014](#)

**References:**

Altshuller, A. P., and Cohen, I. R.: Application of Diffusion Cells to Production of Known Concentration of Gaseous Hydrocarbons, *Anal. Chem.*, 32, 802-810, 1960.

Cummings, G. A. M., McLaughlin, E., and Ubbelohde, A. R.: Collision parameters of C6-C9 hydrocarbons in the vapour phase: the hydrogen effect, *J. Chem. Soc.*, 1141-1144, 1955.

Elliott, R. W., and Watts, H.: Diffusion of some Hydrocarbons in Air: a Regularity in the Diffusion Coefficients of a Homologous Series, *Can. J. Chem.*, 50, 31-34.

## 2.4 C<sub>3</sub>H<sub>4</sub> (propadiene), C<sub>4</sub>H<sub>6</sub> (1,3-butadiene), C<sub>5</sub>H<sub>8</sub> (isoprene), C<sub>6</sub>H<sub>10</sub> (1,5-hexadiene, 2,3-dimethyl-1,2-butadiene)

Last evaluated: 11 July 2014

| Species                    | Reference                  | T (K) | D <sub>m</sub> (T) | D <sub>m</sub> (298) | D <sub>e</sub> (T) | (D <sub>e</sub> /D <sub>m</sub> -1) (%) |
|----------------------------|----------------------------|-------|--------------------|----------------------|--------------------|-----------------------------------------|
| propadiene                 | Elliott and Watts, 1972    | 298   | 106                | 106                  | 93                 | -12                                     |
| 1,3-butadiene              | Elliott and Watts, 1972    | 298   | 88                 | 88                   | 78                 | -11                                     |
| isoprene                   | Altshuller and Cohen, 1960 | 288   | 69                 | 73                   | 64                 | -7                                      |
| 1,5-hexadiene              | Cummings et al., 1955      | 288   | 59                 | 62                   | 58                 | -1                                      |
| 2,3-dimethyl-1,3-butadiene | Cummings et al., 1955      | 288   | 57                 | 60                   | 58                 | 2                                       |

### Comments:

**propadiene, 1,3-butadiene and C<sub>5</sub>H<sub>8</sub>:** The diffusivities of propadiene and 1,3-butadiene were measured by Elliott and Watts (1972) at 298 K and that of isoprene was measured by Altshuller and Cohen (1960) at 288 K. The differences between the measured and estimated values are ~10%.

**1,5-hexadiene and 2,3-dimethyl-1,3-butadiene:** The diffusivities of 1,5-hexadiene and 2,3-dimethyl-1,3-butadiene were measured at 288 K by Cummings et al. (1955), and the measured diffusivities are in excellent agreement with the estimated values.

### Preferred value in N<sub>2</sub> (or air/O<sub>2</sub>) at 298 K:

**propadiene:** (106±13) Torr cm<sup>2</sup> s<sup>-1</sup>

**1,3-butadiene:** (88±10) Torr cm<sup>2</sup> s<sup>-1</sup>

**isoprene:** (73±6) Torr cm<sup>2</sup> s<sup>-1</sup>

The preferred diffusivities of propadiene and 1,3-butadiene are based on the measurement of Elliott and Watts (1972) at 298 K, and that of isoprene is based on the measurement of Altshuller and Cohen (1960) at 288 K, extrapolated to 298 K. The uncertainties reflect the corresponding difference between the measurements and estimations.

**1,5-hexadiene and 2,3-dimethyl-1,3-butadiene:** (61±2) Torr cm<sup>2</sup> s<sup>-1</sup>

A single preferred diffusivity, (61±2) Torr cm<sup>2</sup> s<sup>-1</sup>, is given to both 1,5-hexadiene and 2,3-dimethyl-1,3-butadiene. It is the average of those extrapolated to 298 K from those measured at 288 K by Cummings et al. (1955). The given uncertainty reflects the difference between the measured and estimated diffusivities.

Last change in the preferred value: 11 July 2014

**References:**

Altshuller, A. P., and Cohen, I. R.: Application of Diffusion Cells to Production of Known Concentration of Gaseous Hydrocarbons, *Anal. Chem.*, 32, 802-810, 1960.

Cummings, G. A. M., McLaughlin, E., and Ubbelohde, A. R.: Collision parameters of C6-C9 hydrocarbons in the vapour phase: the hydrogen effect, *J. Chem. Soc.*, 1141-1144, 1955.

Elliott, R. W., and Watts, H.: Diffusion of some Hydrocarbons in Air: a Regularity in the Diffusion Coefficients of a Homologous Series, *Can. J. Chem.*, 50, 31-34.

## 2.5 C<sub>2</sub>H<sub>2</sub> (ethyne), C<sub>3</sub>H<sub>4</sub> (propyne), C<sub>4</sub>H<sub>6</sub> (1-butyne)

Last evaluated: 11 July 2014

| Species  | Reference               | <i>T</i> (K) | <i>D<sub>m</sub></i> ( <i>T</i> ) | <i>D<sub>m</sub></i> (298) | <i>D<sub>e</sub></i> ( <i>T</i> ) | ( <i>D<sub>e</sub></i> / <i>D<sub>m</sub></i> -1) (%) |
|----------|-------------------------|--------------|-----------------------------------|----------------------------|-----------------------------------|-------------------------------------------------------|
| ethyne   | Elliott and Watts, 1972 | 298          | 111                               | 111                        | 123                               | 11                                                    |
| propyne  | Elliott and Watts, 1972 | 298          | 100                               | 100                        | 93                                | -7                                                    |
| 1-butyne | Elliott and Watts, 1972 | 298          | 88                                | 88                         | 78                                | -12                                                   |

### Comments:

**ethyne, propyne, and 1-butyne:** The diffusivities of ethyne, propyne, and 1-butyne were measured at 298 K by Elliott and Watts (1972), and the differences between the measured and estimated values are ~10%.

### Preferred value in N<sub>2</sub> (or air/O<sub>2</sub>) at 298 K:

ethyne: (111±12) Torr cm<sup>2</sup> s<sup>-1</sup>

propyne: (100±7) Torr cm<sup>2</sup> s<sup>-1</sup>

1-butyne: (88±10) Torr cm<sup>2</sup> s<sup>-1</sup>

The preferred diffusivities of ethyne, propyne, and 1-butyne are based on the measurement by Elliott and Watts (1972), and the given uncertainties reflects the corresponding differences between the measured and estimated values.

Last change in the preferred value: 11 July 2014

### References:

Elliott, R. W., and Watts, H.: Diffusion of some Hydrocarbons in Air: a Regularity in the Diffusion Coefficients of a Homologous Series, *Can. J. Chem.*, 50, 31-34.

## 3 Aromatic hydrocarbons

### 3.1 C<sub>6</sub>H<sub>6</sub> (benzene)

Last evaluated: 12 July 2014

| Species | Reference                     | T (K) | D <sub>m</sub> (T) | D <sub>m</sub> (298) | D <sub>e</sub> (T) | (D <sub>e</sub> /D <sub>m</sub> -1) (%) |
|---------|-------------------------------|-------|--------------------|----------------------|--------------------|-----------------------------------------|
| benzene | Lee and Wilke, 1954           | 298   | 73                 | 73                   | 69                 | -6                                      |
|         | Altshuller and Cohen,<br>1960 | 300   | 70                 | 70                   | 70                 | -1                                      |
|         |                               | 303   | 72                 |                      | 71                 | -2                                      |
|         |                               | 334   | 87                 |                      | 84                 | -4                                      |
|         | Hudson et al., 1960           | 311   | 77                 | 72                   | 74                 | -4                                      |
|         | Getzinger and Wilke,<br>1967  | 308   | 81                 | 77                   | 73                 | -10                                     |
|         | Lugg, 1968                    | 298   | 71                 | 71                   | 69                 | -3                                      |
|         | Katan, 1969                   | 295   | 69                 | 70                   | 68                 | -1                                      |
|         | Arnikar and Ghule,<br>1969    | 353   | 101                | 75                   | 93                 | -8                                      |
|         | Nagata and<br>Hasegawa, 1970  | 364   | 98                 | 69                   | 98                 | 0                                       |
|         |                               | 378   | 106                |                      | 105                | -1                                      |
|         |                               | 393   | 117                |                      | 113                | -3                                      |
|         |                               | 408   | 124                |                      | 119                | -4                                      |
| 423     |                               | 125   |                    | 127                  | 1                  |                                         |

#### Comments:

The diffusivities of benzene were measured over a broad temperature range (295-423 K), and the differences between the measured and estimated values are <10%. If extrapolated to 298 K, the diffusivities measured at other temperatures (Altshuller and Cohen, 1960; Hudson et al., 1960; Getzinger and Wilke, 1967; Katan, 1969, Arnikar and Ghule, 1969; Nagata and Hasegawa, 1970) agree well with those measured at 298 K (Lee and Wilke, 1954; Lugg, 1968).

**Preferred value in N<sub>2</sub> (or air/O<sub>2</sub>) at 298 K:** (72±3) Torr cm<sup>2</sup> s<sup>-1</sup>

The preferred diffusivity at 298 K, is the average of those measured at 298 K (Lee and Wilke, 1954; Lugg, 1968) and those extrapolated to 298 K from those measured at other temperatures (Altshuller and Cohen, 1960; Hudson et al., 1960; Getzinger and Wilke, 1967; Katan, 1969, Arnikar and Ghule, 1969; Nagata and Hasegawa, 1970).

Last change in the preferred value: 12 July 2014

#### References:

Altshuller, A. P., and Cohen, I. R.: Application of Diffusion Cells to Production of Known Concentration of Gaseous Hydrocarbons, *Anal. Chem.*, 32, 802-810, 1960.

- Arnikar, H. J., and Ghule, H. M.: Electrodeless discharge as detector in the rapid determination of binary diffusion coefficient of gases, *Int. J. Electronics.*, 26, 159-162, 1969.
- Getzinger, R. W., and Wilke, C. R.: An experimental study of nonequimolar diffusion in ternary gas mixtures, *Aiche J.*, 13, 577-580, 1967.
- Hudson, G. H., McCoubrey, J. C., and Ubbelohde, A. R.: Vapour diffusion coefficients and collision parameters for cyclic molecules, *Trans. Faraday Soc.*, 56, 1144-1151, 1960.
- Katan, T.: Diffusion Coefficients of Vapors Measured with a Moving Boundary, *J. Chem. Phys.*, 50, 233-238, 1969.
- Lee, C. Y., and Wilke, C. R.: Measurements of vapor diffusion coefficient, *Ind. Eng. Chem.*, 46, 2381-2387, 1954.
- Lugg, G. A.: Diffusion coefficients of some organic and other vapors in air, *Anal. Chem.*, 40, 1072-1077, 1968.
- Nagata, I., and Hasegawa, T.: Gaseous interdiffusion coefficients, *J. Chem. Eng. Japan*, 3, 143-145, 1970.



### 3.2 C<sub>7</sub>H<sub>8</sub> (toluene)

Last evaluated: 12 July 2014

| Species | Reference                  | T (K) | D <sub>m</sub> (T) | D <sub>m</sub> (298) | D <sub>e</sub> (T) | (D <sub>e</sub> /D <sub>m</sub> -1) (%) |
|---------|----------------------------|-------|--------------------|----------------------|--------------------|-----------------------------------------|
| toluene | Mack, 1925                 | 298   | 64                 | 64                   | 62                 | -3                                      |
|         | Gilliland, 1937            | 299   | 65                 | 65                   | 62                 | -5                                      |
|         |                            | 312   | 70                 |                      | 67                 | -4                                      |
|         |                            | 332   | 79                 |                      | 75                 | -5                                      |
|         | Fairbanks and Wilke, 1950  | 301   | 74                 | 73                   | 63                 | -15                                     |
|         | Altshuller and Cohen, 1960 | 298   | 69                 | 69                   | 62                 | -10                                     |
|         |                            | 318   | 73                 |                      | 69                 | -6                                      |
|         | Lugg, 1968                 | 298   | 65                 | 65                   | 62                 | -4                                      |

#### Comments:

The diffusivities of toluene were measured over 298-332 K, and the differences between the measured and estimated diffusivities are <15%.

**Preferred value in N<sub>2</sub> (or air/O<sub>2</sub>) at 298 K:** (67±4) Torr cm<sup>2</sup> s<sup>-1</sup>

The preferred diffusivity at 298 K, is the average of those measured at 298 K (Mack, 1925; Altshuller and Cohen, 1960; Lugg, 1968) and those extrapolated to 298 K from those measured at other temperatures (Gilliland, 1937; Fairbank and Wilke, 1950).

Last change in the preferred value: 12 July 2014

#### References:

- Altshuller, A. P., and Cohen, I. R.: Application of Diffusion Cells to Production of Known Concentration of Gaseous Hydrocarbons, *Anal. Chem.*, 32, 802-810, 1960.
- Fairbanks, D. F., and Wilke, C. R.: Diffusion Coefficients in Multicomponent Gas Mixtures, *Ind. Eng. Chem.*, 42, 471-475, 1950.
- Gilliland, E. R.: Diffusion Coefficients in Gaseous Systems, *Ind. Eng. Chem.*, 26, 681-685, 1934.
- Lugg, G. A.: Diffusion coefficients of some organic and other vapors in air, *Anal. Chem.*, 40, 1072-1077, 1968.
- Mack, E.: Average cross-sectional areas of molecules by gaseous diffusion methods, *J. Am. Chem. Soc.*, 47, 2468-2482, 1925.

### 3.3 C<sub>8</sub>H<sub>10</sub> (ethyl benzene, o-xylene, m-xylene, p-xylene)

Last evaluated: 11 July 2014

| Species       | Reference  | T (K) | D <sub>m</sub> (T) | D <sub>m</sub> (298) | D <sub>e</sub> (T) | (D <sub>e</sub> /D <sub>m</sub> -1) (%) |
|---------------|------------|-------|--------------------|----------------------|--------------------|-----------------------------------------|
| ethyl benzene | Lugg, 1968 | 298   | 57                 | 57                   | 57                 | -1                                      |
| o-xylene      | Lugg, 1968 | 298   | 55                 | 55                   | 57                 | 3                                       |
| m-xylene      | Lugg, 1968 | 298   | 52                 | 52                   | 57                 | 9                                       |
| p-xylene      | Lugg, 1968 | 298   | 51                 | 51                   | 57                 | 12                                      |

#### Comments:

##### ethyl benzene, o-xylene, m-xylene, p-xylene:

The differences between the measured (Lugg, 1968) and estimated diffusivities at 298 K are 1%, 3%, 9%, and 12% for ethyl benzene, o-xylene, m-xylene and p-xylene, respectively.

#### Preferred value in N<sub>2</sub> (or air/O<sub>2</sub>) at 298 K:

**ethyl benzene:** (57±1) Torr cm<sup>2</sup> s<sup>-1</sup>

**o-xylene:** (55±2) Torr cm<sup>2</sup> s<sup>-1</sup>

**m-xylene:** (52±5) Torr cm<sup>2</sup> s<sup>-1</sup>

**p-xylene:** (51±6) Torr cm<sup>2</sup> s<sup>-1</sup>

The measured diffusivities at 298 K by Lugg (1968) are preferred, and the given uncertainties reflects the differences between the measurements and estimations.

Last change in the preferred value: 11 July 2014

#### References:

Lugg, G. A.: Diffusion coefficients of some organic and other vapors in air, *Anal. Chem.*, 40, 1072-1077, 1968.

### 3.4 C<sub>9</sub>H<sub>12</sub> (n-propylbenzene, iso-propylbenzene, 1,2,4-trimethylbenzene, 1,3,5-trimethylbenzene)

Last evaluated: 11 July 2014

| Species                 | Reference  | T (K) | D <sub>m</sub> (T) | D <sub>m</sub> (298) | D <sub>e</sub> (T) | (D <sub>e</sub> /D <sub>m</sub> -1) (%) |
|-------------------------|------------|-------|--------------------|----------------------|--------------------|-----------------------------------------|
| n-propyl benzene        | Lugg, 1968 | 298   | 51                 | 51                   | 53                 | 4                                       |
| iso-propyl benzene      | Lugg, 1968 | 298   | 51                 | 51                   | 53                 | 3                                       |
| 1,2,4-trimethyl benzene | Lugg, 1968 | 298   | 49                 | 49                   | 53                 | 9                                       |
| 1,3,5-trimethyl benzene | Lugg, 1968 | 298   | 50                 | 50                   | 53                 | 5                                       |

#### Comments:

#### n-propyl benzene, iso-propyl benzene, 1,2,4-trimethyl benzene, 1,3,5-trimethyl benzene:

The measured diffusivities of n-propyl benzene, iso-propyl benzene, 1,2,4-trimethyl benzene, and 1,3,5-trimethyl benzene at 298 K are 4%, 3%, 9%, and 5% lower than the estimated values, respectively.

#### Preferred value in N<sub>2</sub> (or air/O<sub>2</sub>) at 298 K:

**n-propyl benzene:** (51±2) Torr cm<sup>2</sup> s<sup>-1</sup>

**iso-propyl benzene:** (51±2) Torr cm<sup>2</sup> s<sup>-1</sup>

**1,2,4-trimethyl benzene:** (49±4) Torr cm<sup>2</sup> s<sup>-1</sup>

**1,3,5-trimethyl benzene:** (50±3) Torr cm<sup>2</sup> s<sup>-1</sup>

The measured diffusivities at 298 K by Lugg (1968) are preferred, and the given uncertainties reflects the differences between the measurements and estimations.

Last change in the preferred value: 11 July 2014

#### References:

Lugg, G. A.: Diffusion coefficients of some organic and other vapors in air, *Anal. Chem.*, 40, 1072-1077, 1968.

### 3.5 C<sub>10</sub>H<sub>14</sub> (p-cymene, p-tert-butyltoluene) and C<sub>8</sub>H<sub>8</sub> (styrene)

Last evaluated: 11 July 2014

| Species              | Reference  | T (K) | D <sub>m</sub> (T) | D <sub>m</sub> (298) | D <sub>e</sub> (T) | (D <sub>e</sub> /D <sub>m</sub> -1) (%) |
|----------------------|------------|-------|--------------------|----------------------|--------------------|-----------------------------------------|
| p-cymene             | Lugg, 1968 | 298   | 48                 | 48                   | 49                 | 2                                       |
| p-tert-butyl toluene | Lugg, 1968 | 298   | 43                 | 43                   | 49                 | 13                                      |
| styrene              | Lugg, 1968 | 298   | 53                 | 53                   | 58                 | 9                                       |

#### Comments:

**p-cymene, p-tert-butyl toluene, styrene:** The measured diffusivities of p-cymene, p-tert-butyl toluene, and styrene at 298 K (Lugg, 1968) are 2%, 13%, and 9% lower than the estimated values, respectively.

#### Preferred value in N<sub>2</sub> (or air/O<sub>2</sub>) at 298 K:

**p-cymene:** (48±1) Torr cm<sup>2</sup> s<sup>-1</sup>

**p-tert-butyl toluene:** (43±6) Torr cm<sup>2</sup> s<sup>-1</sup>

**styrene:** (53±5) Torr cm<sup>2</sup> s<sup>-1</sup>

The measured diffusivities at 298 K by Lugg (1968) are preferred, and the given uncertainties reflects the differences between the measurements and estimations.

Last change in the preferred value: 11 July 2014

#### References:

Lugg, G. A.: Diffusion coefficients of some organic and other vapors in air, *Anal. Chem.*, 40, 1072-1077, 1968.

### 3.6 C<sub>10</sub>H<sub>8</sub> (naphthalene), C<sub>12</sub>H<sub>10</sub> (diphenyl), C<sub>14</sub>H<sub>10</sub> (anthracene)

Last evaluated: 11 July 2014

| Species     | Reference       | T (K) | D <sub>m</sub> (T) | D <sub>m</sub> (298) | D <sub>e</sub> (T) | (D <sub>e</sub> /D <sub>m</sub> -1) (%) |
|-------------|-----------------|-------|--------------------|----------------------|--------------------|-----------------------------------------|
| naphthalene | Mack, 1925      | 298   | 46                 | 46                   | 51                 | 10                                      |
| diphenyl    | Mack, 1925      | 298   | 55                 | 55                   | 48                 | -13                                     |
|             | Gilliland, 1937 | 490   | 122                | 51                   | 115                | -5                                      |
| anthracene  | Mack, 1925      | 373   | 60                 | 40                   | 65                 | 9                                       |

#### Comments:

**naphthalene** The measured diffusivity of naphthalene at 298 K (Mack, 1925) is 10% lower than the estimated value.

**diphenyl:** The measured diffusivities at 298 K (Mack, 1925) and at 490 K (Gilliland, 1937) show good agreement with the estimated values. If extrapolated to 298 K, the measurement carried out at 490 K by Gilliland (1937) agrees well with that measured at 298 K (Mack, 1925)

**anthracene:** The diffusivity measured at 373 K (Mack, 1925) is 9% lower than the estimated value.

#### Preferred value in N<sub>2</sub> (or air/O<sub>2</sub>) at 298 K:

**naphthalene:** (46±5) Torr cm<sup>2</sup> s<sup>-1</sup>

The measured diffusivity at 298 K by Mack (1925) is preferred, and the given uncertainties reflects the difference between the measurement and estimation.

**diphenyl:** (52±7) Torr cm<sup>2</sup> s<sup>-1</sup>

The preferred diffusivity is the average of that measured at 298 K (Mack, 1925) and that extrapolated to 298 K from the measurement at 490 K (Gilliland, 1937). The given uncertainty (±13%) reflects the difference between the measurement and estimation at 298 K.

**anthracene:** (40±4) Torr cm<sup>2</sup> s<sup>-1</sup>

The preferred diffusivity at 298 K, (40±4) Torr cm<sup>2</sup> s<sup>-1</sup>, is extrapolated to 298 K from the measurement carried out at 373 K by Mack (1925). The given uncertainty reflects the relative difference between the measurement and estimation at 373 K.

Last change in the preferred value: 11 July 2014

**References:**

Gilliland, E. R.: Diffusion Coefficients in Gaseous Systems, *Ind. Eng. Chem.*, 26, 681-685, 1934.

Mack, E.: Average cross-sectional areas of molecules by gaseous diffusion methods, *J. Am. Chem. Soc.*, 47, 2468-2482, 1925.

## 4 Alcohols

### 4.1 CH<sub>4</sub>O (methanol)

Last evaluated: 12 July 2014

| Species  | Reference                  | <i>T</i> (K) | <i>D<sub>m</sub></i> ( <i>T</i> ) | <i>D<sub>m</sub></i> (298) | <i>D<sub>e</sub></i> ( <i>T</i> ) | ( <i>D<sub>e</sub></i> / <i>D<sub>m</sub></i> -1) (%) |
|----------|----------------------------|--------------|-----------------------------------|----------------------------|-----------------------------------|-------------------------------------------------------|
| methanol | Altshuller and Cohen, 1960 | 298          | 117                               | 117                        | 123                               | 5                                                     |
|          | Getzinger and Wilke, 1967  | 308          | 145                               | 137                        | 160                               | 10                                                    |
|          | Lugg, 1968                 | 298          | 116                               | 116                        | 123                               | 6                                                     |
|          | Mrzcek et al., 1968        | 328          | 149                               | 126                        | 146                               | -2                                                    |
|          | Katan, 1969                | 295          | 121                               | 123                        | 121                               | 0                                                     |
|          | Arnikar and Ghule, 1969    | 355          | 190                               | 140                        | 167                               | -12                                                   |

#### Comments:

The measured diffusivities of methanol over 295-355 K show good agreement with estimated values. If extrapolated to 298 K, the measurements carried out at 308 K (Getzinger and Wilke, 1967), 328 K (Mrzcek et al., 1968), 295 K (Katzan, 1968) and 355 K (Arnikar and Ghuele, 1969) agree well with those performed at 298 K (Altshuller and Cohen, 1960; Lugg, 1968).

**Preferred value in N<sub>2</sub> (or air/O<sub>2</sub>) at 298 K:** (126±11) Torr cm<sup>2</sup> s<sup>-1</sup>

The preferred diffusivity of methanol at 298 K, is the average of those measured at 298 K by Altshuller and Cohen (1960) and Lugg (1968) and those extrapolated to 298 K from those measured at 295 K (Katzan, 1968), 308 K (Getzinger and Wilke, 1967), 328 K (Mrzcek et al., 1968), and 355 K (Arnikar and Ghuele, 1969).

Last change in the preferred value: 12 July 2014

#### References:

- Altshuller, A. P., and Cohen, I. R.: Application of Diffusion Cells to Production of Known Concentration of Gaseous Hydrocarbons, *Anal. Chem.*, 32, 802-810, 1960.
- Arnikar, H. J., and Ghule, H. M.: Electrodeless discharge as detector in the rapid determination of binary diffusion coefficient of gases, *Int. J. Electronics.*, 26, 159-162, 1969.
- Getzinger, R. W., and Wilke, C. R.: An experimental study of nonequimolar diffusion in ternary gas mixtures, *Aiche J.*, 13, 577-580, 1967.

- Katan, T.: Diffusion Coefficients of Vapors Measured with a Moving Boundary, *J. Chem. Phys.*, 50, 233-238, 1969.
- Lugg, G. A.: Diffusion coefficients of some organic and other vapors in air, *Anal. Chem.*, 40, 1072-1077, 1968.
- Mrazek, R. V., Wicks, C. E., and Prabhu, K. N. S.: Dependence of the diffusion coefficient on composition in binary gaseous systems, *J. Chem. Eng. Data*, 13, 508-510, 1968.



## 4.2 C<sub>2</sub>H<sub>6</sub>O (ethanol)

Last evaluated: 12 July 2014

| Species | Reference                    | <i>T</i> (K) | <i>D<sub>m</sub></i> ( <i>T</i> ) | <i>D<sub>m</sub></i> (298) | <i>D<sub>e</sub></i> ( <i>T</i> ) | ( <i>D<sub>e</sub></i> / <i>D<sub>m</sub></i> -1) (%) |
|---------|------------------------------|--------------|-----------------------------------|----------------------------|-----------------------------------|-------------------------------------------------------|
| ethanol | Lee and Wilke, 1954          | 298          | 103                               | 103                        | 94                                | -8                                                    |
|         | Arnikar et al., 1967         | 353          | 141                               | 105                        | 127                               | -10                                                   |
|         | Getzinger and Wilke,<br>1967 | 308          | 109                               | 103                        | 100                               | -9                                                    |
|         | Lugg, 1968                   | 298          | 90                                | 90                         | 94                                | 5                                                     |
|         | Arnikar and Ghule,<br>1969   | 355          | 135                               | 99                         | 128                               | -5                                                    |
|         | Katan, 1969                  | 295          | 88                                | 90                         | 93                                | 5                                                     |

### Comments:

The measured diffusivities of ethanol over 295-355 K show good agreement with the estimated values. If extrapolated to 298 K, the measurements performed at 295 K (Katan 1969), 308 K (Getzinger and Wilke, 1967), 355 K (Arnikar and Ghule, 1969), and 353 K (Arnikar et al., 1967) agree well with those at 298-299 K (Lee and Wilkem 1954; Lugg, 1968).

### Preferred value in N<sub>2</sub> (or air/O<sub>2</sub>) at 298 K: (98±7) Torr cm<sup>2</sup> s<sup>-1</sup>

The preferred diffusivity of ethanol at 298 K, is the average of those measured at 298-299 K (Lee and Wilkem 1954; Lugg, 1968) and those extrapolated to 298 K from measurements at 295 K (Katan 1969), 308 K (Getzinger and Wilke, 1967), 355 K (Arnikar and Ghule, 1969), and 353 K (Arnikar et al., 1967).

Last change in the preferred value: 12 July 2014

### References:

- Arnikar, H. J., and Ghule, H. M.: Electrodeless discharge as detector in the rapid determination of binary diffusion coefficient of gases, *Int. J. Electronics.*, 26, 159-162, 1969.
- Arnikar, H. J., Rao, T. S., and Karmarkar, K. H.: Electrodeless Discharge as Detector in Gas Chromatography m. Study of Inter-diffusion of Gases†, *Int. J. Electronics.*, 22, 381-385, 1967.
- Getzinger, R. W., and Wilke, C. R.: An experimental study of nonequimolal diffusion in ternary gas mixtures, *Aiche J.*, 13, 577-580, 1967.

Katan, T.: Diffusion Coefficients of Vapors Measured with a Moving Boundary, *J. Chem. Phys.*, 50, 233-238, 1969.

Lee, C. Y., and Wilke, C. R.: Measurements of vapor diffusion coefficient, *Ind. Eng. Chem.*, 46, 2381-2387, 1954.

Lugg, G. A.: Diffusion coefficients of some organic and other vapors in air, *Anal. Chem.*, 40, 1072-1077, 1968.

### 4.3 C<sub>3</sub>H<sub>8</sub>O (1-propanol, 2-propanol), C<sub>3</sub>H<sub>6</sub>O (prop-2-en-1-ol)

Last evaluated: 12 July 2014

| Species                   | Reference               | <i>T</i> (K) | <i>D<sub>m</sub></i> ( <i>T</i> ) | <i>D<sub>m</sub></i> (298) | <i>D<sub>e</sub></i> ( <i>T</i> ) | ( <i>D<sub>e</sub></i> / <i>D<sub>m</sub></i> -1) (%) |
|---------------------------|-------------------------|--------------|-----------------------------------|----------------------------|-----------------------------------|-------------------------------------------------------|
| 1-propanol                | Lugg, 1968              | 298          | 75                                | 75                         | 79                                | 5                                                     |
| 2-propanol                | Gilliland, 1934         | 299          | 75                                | 75                         | 79                                | 5                                                     |
|                           |                         | 312          | 81                                |                            | 85                                | 5                                                     |
|                           |                         | 332          | 92                                |                            | 95                                | 3                                                     |
|                           | Lugg, 1968              | 298          | 77                                | 77                         | 79                                | 3                                                     |
|                           | Arnikar and Ghule, 1969 | 358          | 111                               | 80                         | 109                               | -2                                                    |
| Nagata and Hasegawa, 1970 | 363                     | 121          | 86                                | 111                        | -8                                |                                                       |
|                           | 383                     | 128          |                                   | 122                        | -4                                |                                                       |
| prop-2-en-1-ol            | Lugg, 1968              | 298          | 78                                | 78                         | 81                                | 4                                                     |

#### Comments:

**1-propanol, prop-2-en-1-ol:** The measured diffusivities of 1-propanol and prop-2-en-1-ol at 298 K by Lugg (1968) are in good agreement with the estimated values.

2-propanol:

2-propanol: The measured diffusivities of 2-propanol over 298-383 K all agree well with the estimated values. If extrapolated to 298 K, the measurements carried out at other temperatures (Arnikar and Ghule, 1969; Nagata and Hasegawa, 1970) show good agreement with those carried out at 298-299 K (Gilliland, 1934; Lugg, 1968).

#### Preferred value in N<sub>2</sub> (or air/O<sub>2</sub>) at 298 K:

**1-propanol:** (75±4) Torr cm<sup>2</sup> s<sup>-1</sup>

**prop-2-en-1-ol:** (78±3) Torr cm<sup>2</sup> s<sup>-1</sup>

The measured diffusivities of 1-propanol and prop-2-en-1-ol at 298 K by Lugg (1968) are preferred, and the given uncertainties reflect the corresponding differences between the measured and estimated values.

**2-propanol:** (79±5) Torr cm<sup>2</sup> s<sup>-1</sup>

The preferred diffusivity of 2-propanol, is the average of those measured at 298-299 K by Gilliland (1934) and Lugg (1968) and those extrapolated to 298 K from that measured at 358 K by Arnikar and Ghule (1969) and that measured at 363 K by Nagata and Hasegawa (1970).

Last change in the preferred value: 12 July 2014

**References:**

- Arnikar, H. J., and Ghule, H. M.: Electrodeless discharge as detector in the rapid determination of binary diffusion coefficient of gases, *Int. J. Electronics.*, 26, 159-162, 1969.
- Gilliland, E. R.: Diffusion Coefficients in Gaseous Systems, *Ind. Eng. Chem.*, 26, 681-685, 1934.
- Katan, T.: Diffusion Coefficients of Vapors Measured with a Moving Boundary, *J. Chem. Phys.*, 50, 233-238, 1969.
- Lee, C. Y., and Wilke, C. R.: Measurements of vapor diffusion coefficient, *Ind. Eng. Chem.*, 46, 2381-2387, 1954.
- Lugg, G. A.: Diffusion coefficients of some organic and other vapors in air, *Anal. Chem.*, 40, 1072-1077, 1968.
- Nagata, I., and Hasegawa, T.: Gaseous interdiffusion coefficients, *J. Chem. Eng. Japan*, 3, 143-145, 1970.

#### 4.4 C<sub>4</sub>H<sub>10</sub>O (1-butanol, 2-butanol, methyl-1-propanol, methyl-2-propanol)

Last evaluated: 12 July 2014

| Species           | Reference       | T (K) | D <sub>m</sub> (T) | D <sub>m</sub> (298) | D <sub>e</sub> (T) | (D <sub>e</sub> /D <sub>m</sub> -1) (%) |
|-------------------|-----------------|-------|--------------------|----------------------|--------------------|-----------------------------------------|
| 1-butanol         | Gilliland, 1934 | 299   | 66                 | 66                   | 69                 | 4                                       |
|                   |                 | 312   | 70                 |                      | 75                 | 7                                       |
|                   |                 | 332   | 79                 |                      | 83                 | 5                                       |
|                   | Lugg, 1968      | 298   | 65                 | 65                   | 69                 | 5                                       |
| 2-butanol         | Gilliland, 1934 | 299   | 68                 | 67                   | 69                 | 2                                       |
|                   |                 | 312   | 73                 |                      | 75                 | 3                                       |
|                   |                 | 332   | 82                 |                      | 83                 | 1                                       |
|                   | Lugg, 1968      | 298   | 68                 | 68                   | 69                 | 2                                       |
| methyl-1-propanol | Lugg, 1968      | 298   | 67                 | 67                   | 69                 | 3                                       |
| methyl-2-propanol | Lugg, 1968      | 298   | 66                 | 66                   | 69                 | 4                                       |

##### Comments:

**1-butanol:** The diffusivities of 1-butanol were measured at 299, 312, and 332 K by Gilliland (1934) and at 298 K by Lugg (1968). The diffusivities at 298-299 K reported by the two studies show excellent agreement, and the estimated diffusivities agree well with the measured value over 298-332 K.

**2-butanol:** The diffusivities of 2-butanol were measured at 299, 312, and 332 K by Gilliland (1934) and at 298 K by Lugg (1968). The diffusivities at 298-299 K reported by the two studies show excellent agreement, and the estimated diffusivities agree well with the measured value over 298-332 K.

**methyl-1-propanol, methyl-2-propanol:** The diffusivities of methyl-1-propanol and methyl-2-propanol were measured by Lugg (1968) at 298 K, and the measured diffusivities are in excellent agreement with estimated values.

##### Preferred value in N<sub>2</sub> (or air/O<sub>2</sub>) at 298 K:

**1-butanol:** (66±1) Torr cm<sup>2</sup> s<sup>-1</sup>

**2-butanol:** (67±1) Torr cm<sup>2</sup> s<sup>-1</sup>

The preferred diffusivities of 1-butanol and 2-butanol at 298 K are the average of those measured at 298-299 K by Gilliland (1934) and Lugg (1968).

**methyl-1-propanol:** (67±2) Torr cm<sup>2</sup> s<sup>-1</sup>

**methyl-2-propanol:** (66±3) Torr cm<sup>2</sup> s<sup>-1</sup>

The diffusivities of methyl-1-propanol and methyl-2-propanol measured by Lugg (1968) are preferred, and the given uncertainties reflect the corresponding differences between the measured and estimated values.

[Last change in the preferred value: 12 July 2014](#)

**References:**

Gilliland, E. R.: Diffusion Coefficients in Gaseous Systems, *Ind. Eng. Chem.*, 26, 681-685, 1934.

Lugg, G. A.: Diffusion coefficients of some organic and other vapors in air, *Anal. Chem.*, 40, 1072-1077, 1968.

## 4.5 C<sub>5</sub>H<sub>12</sub>O (1-pentanol, 2-pentanol)

Last evaluated: 12 July 2014

| Species    | Reference       | T (K) | D <sub>m</sub> (T) | D <sub>m</sub> (298) | D <sub>e</sub> (T) | (D <sub>e</sub> /D <sub>m</sub> -1) (%) |
|------------|-----------------|-------|--------------------|----------------------|--------------------|-----------------------------------------|
| 1-pentanol | Lugg, 1968      | 298   | 54                 | 54                   | 62                 | 14                                      |
| 2-pentanol | Gilliland, 1934 | 299   | 54                 | 54                   | 62                 | 15                                      |
|            |                 | 312   | 58                 |                      | 67                 | 16                                      |
|            |                 | 332   | 65                 |                      | 75                 | 15                                      |
|            | Lugg, 1968      | 298   | 55                 | 55                   | 62                 | 12                                      |

### Comments:

**1-pentanol:** The measured diffusivity of 1-pentanol at 298 K by Lugg (1968) is 14% lower than the estimated value.

**2-pentanol:** The differences between the measured diffusivities at 299, 312, and 332 K by Gilliland (1934) and that at 298 K by Lugg (1968) are ~15%. The measured diffusivity at 299 K by Gilliland (1967) show excellent agreement with that measured at 298 K by Lugg (1968).

### Preferred value in N<sub>2</sub> (or air/O<sub>2</sub>) at 298 K:

**1-pentanol:** (54±8) Torr cm<sup>2</sup> s<sup>-1</sup>

The diffusivity of 1-pentanol measured by Lugg (1968) at 298 K is preferred, and the given uncertainties reflects the difference between the measured and estimated diffusivities at 298 K.

**2-pentanol:** (54±8) Torr cm<sup>2</sup> s<sup>-1</sup>

The preferred diffusivity at 298 K is the average of that measured by Gilliland (1934) at 299 K and that measured by Lugg (1968) at 298 K, and the given uncertainty reflects the difference between the measurements and estimations at 298-299 K.

Last change in the preferred value: 12 July 2014

### References:

- Gilliland, E. R.: Diffusion Coefficients in Gaseous Systems, *Ind. Eng. Chem.*, 26, 681-685, 1934.
- Lugg, G. A.: Diffusion coefficients of some organic and other vapors in air, *Anal. Chem.*, 40, 1072-1077, 1968

#### 4.6 C<sub>6</sub>H<sub>14</sub>O (1-hexanol, 2-ethyl-2-pentanol), C<sub>7</sub>H<sub>16</sub>O (1-heptanol), C<sub>8</sub>H<sub>18</sub>O (1-octanol)

Last evaluated: 12 July 2014

| Species             | Reference  | T (K) | D <sub>m</sub> (T) | D <sub>m</sub> (298) | D <sub>e</sub> (T) | (D <sub>e</sub> /D <sub>m</sub> -1) (%) |
|---------------------|------------|-------|--------------------|----------------------|--------------------|-----------------------------------------|
| 1-hexanol           | Lugg, 1968 | 298   | 47                 | 47                   | 57                 | 21                                      |
| 2-ethyl-1-butanol   | Lugg, 1968 | 298   | 50                 | 50                   | 57                 | 14                                      |
| 1-methyl-2-pentanol | Lugg, 1968 | 298   | 47                 | 47                   | 57                 | 21                                      |
| 1-heptanol          | Lugg, 1968 | 298   | 42                 | 42                   | 52                 | 24                                      |
| 1-octanol           | Lugg, 1968 | 298   | 38                 | 38                   | 49                 | 27                                      |

##### Comments:

**1-hexanol, 2-ethyl-1-butanol, 1-methyl-2-pentanol, 1-heptanol, 1-octanol:** The differences between the measured (Lugg, 1968) and estimated diffusivities are 21% for 1-hexanol, 14% for 2-ethyl-1-butanol, 21% for 1-methyl-2-pentanol, 24% for 1-heptanol, and 27% for 1-octanol, respectively.

##### Preferred value in N<sub>2</sub> (or air/O<sub>2</sub>) at 298 K:

**1-hexanol:** (47±10) Torr cm<sup>2</sup> s<sup>-1</sup>

**2-ethyl-1-butanol:** (50±7) Torr cm<sup>2</sup> s<sup>-1</sup>

**1-methyl-2-pentanol:** (47±10) Torr cm<sup>2</sup> s<sup>-1</sup>

**1-heptanol:** (42±10) Torr cm<sup>2</sup> s<sup>-1</sup>

**1-octanol:** (38±11) Torr cm<sup>2</sup> s<sup>-1</sup>

The measured diffusivities of 1-hexanol, 2-ethyl-1-butanol, 1-methyl-2-pentanol, 1-heptanol, and 1-octanol at 298 K by Lugg (1968) are preferred, and the given uncertainties reflect the corresponding differences between the measurements and estimations.

Last change in the preferred value: 12 July 2014

##### References:

Lugg, G. A.: Diffusion coefficients of some organic and other vapors in air, *Anal. Chem.*, 40, 1072-1077, 1968



## 4.7 glycols

Last evaluated: 12 July 2014

| Species         | Reference  | T (K) | Cm(T) | Cm(298) | Ce(T) | (Ce/Cm-1) (%) |
|-----------------|------------|-------|-------|---------|-------|---------------|
| ethyl glycol    | Lugg, 1968 | 298   | 76    | 76      | 86    | 13            |
| propyl glycol   | Lugg, 1968 | 298   | 67    | 67      | 74    | 11            |
| diethyl glycol  | Lugg, 1968 | 298   | 55    | 55      | 63    | 14            |
| triethyl glycol | Lugg, 1968 | 298   | 45    | 45      | 55    | 23            |

### Comments:

**ethyl glycol, propyl glycol, diethyl glycol, triethyl glycol:** The differences between the measured (Lugg, 1968) and estimated diffusivities at 298 K are 13% for ethyl glycol, 11% for propyl glycol, 14% for diethyl glycol, and 23% for triethyl glycol.

### Preferred value in N<sub>2</sub> (or air/O<sub>2</sub>) at 298 K:

**ethyl glycol:** (76±10) Torr cm<sup>2</sup> s<sup>-1</sup>

**propyl glycol:** (67±7) Torr cm<sup>2</sup> s<sup>-1</sup>

**diethyl glycol:** (55±8) Torr cm<sup>2</sup> s<sup>-1</sup>

**triethyl glycol:** (45±10) Torr cm<sup>2</sup> s<sup>-1</sup>

The preferred diffusivities of ethyl glycol, propyl glycol, diethyl glycol, and triethyl glycol at 298 K are based on the measurement of Lugg (1968), and the given uncertainties reflects the corresponding differences between the measured and estimated diffusivities.

Last change in the preferred value: 12 July 2014

### References:

Lugg, G. A.: Diffusion coefficients of some organic and other vapors in air, *Anal. Chem.*, 40, 1072-1077, 1968

## 5 Aldehydes and ketones

### 5.1 C<sub>3</sub>H<sub>6</sub>O (acetone)

Last evaluated: 11 July 2014

| Species | Reference                    | T (K) | D <sub>m</sub> (T) | D <sub>m</sub> (298) | D <sub>e</sub> (T) | (D <sub>e</sub> /D <sub>m</sub> -1) (%) |
|---------|------------------------------|-------|--------------------|----------------------|--------------------|-----------------------------------------|
| acetone | Arnikar et al., 1967         | 353   | 114                | 85                   | 109                | -4                                      |
|         | Lugg, 1968                   | 298   | 80                 | 80                   | 79                 | -1                                      |
|         | Arnikar and Ghule,<br>1969   | 355   | 103                | 76                   | 111                | 8                                       |
|         | Nagaka and<br>Hasegawa, 1970 | 343   | 106                | 83                   | 104                | -2                                      |
|         |                              | 363   | 117                |                      | 115                | -2                                      |
|         |                              | 383   | 129                |                      | 126                | -2                                      |

#### Comments:

The measured diffusivities over 298-383 K (Arnikar et al., 1967; Lugg, 1968; Arnikar and Ghule, 1969; Nagaka and Hasegawa, 1970) show good agreement with estimated values. If extrapolated to 298 K, the measurements carried out at high temperature (Arnikar et al., 1967; Arnikar and Ghule, 1969; Nagaka and Hasegawa, 1970) agree well with the measurement performed at 298 K by Lugg (1968).

**Preferred value in N<sub>2</sub> (or air/O<sub>2</sub>) at 298 K:** (81±5) Torr cm<sup>2</sup> s<sup>-1</sup>

The preferred diffusivity of acetone at 298 K, (81±5) Torr cm<sup>2</sup> s<sup>-1</sup>, is the average of that measured at 298 K by Lugg (1968) and those extrapolated to 298 K from the measurements at high temperature (Arnikar et al., 1967; Arnikar and Ghule, 1969; Nagaka and Hasegawa, 1970).

Last change in the preferred value: 11 July 2014

#### References:

- Arnikar, H. J., and Ghule, H. M.: Electrodeless discharge as detector in the rapid determination of binary diffusion coefficient of gases, *Int. J. Electronics.*, 26, 159-162, 1969.
- Arnikar, H. J., Rao, T. S., and Karmarkar, K. H.: Electrodeless Discharge as Detector in Gas Chromatography m. Study of Inter-diffusion of Gases, *Int. J. Electronics.*, 22, 381-385, 1967.

Lugg, G. A.: Diffusion coefficients of some organic and other vapors in air, *Anal. Chem.*, 40, 1072-1077, 1968.

Nagata, I., and Hasegawa, T.: Gaseous interdiffusion coefficients, *J. Chem. Eng. Japan*, 3, 143-145, 1970.

## 5.2 C<sub>4</sub>H<sub>8</sub>O (methyl ethyl ketone), C<sub>5</sub>H<sub>10</sub>O (methyl n-propyl ketone), C<sub>6</sub>H<sub>10</sub>O (4-methyl pent-3-en-2-one), C<sub>9</sub>H<sub>10</sub>O (isophorone)

Last evaluated: 11 July 2014

| Species                  | Reference  | T (K) | D <sub>m</sub> (T) | D <sub>m</sub> (298) | D <sub>e</sub> (T) | (D <sub>e</sub> /D <sub>m</sub> -1) (%) |
|--------------------------|------------|-------|--------------------|----------------------|--------------------|-----------------------------------------|
| methyl ethyl ketone      | Lugg, 1968 | 298   | 69                 | 69                   | 71                 | 3                                       |
| methyl n-propyl ketone   | Lugg, 1968 | 298   | 60                 | 60                   | 63                 | 5                                       |
| 4-methyl pent-3-en-2-one | Lugg, 1968 | 298   | 58                 | 58                   | 59                 | 2                                       |
| isophorone               | Lugg, 1968 | 298   | 46                 | 46                   | 49                 | 7                                       |

### Comments:

**methyl ethyl ketone, methyl n-propyl ketone, 4-methylpent-3-en-2-one, isophorone:**

The diffusivities of methyl ethyl ketone, methyl n-propyl ketone, 4-methylpent-3-en-2-one, and isophorone were measured at 298 K by Lugg (1968). The differences between the measurements and estimation are <10%.

### Preferred value in N<sub>2</sub> (or air/O<sub>2</sub>) at 298 K:

**methyl ethyl ketone:** (69±2) Torr cm<sup>2</sup> s<sup>-1</sup>

**methyl n-propyl ketone:** (60±3) Torr cm<sup>2</sup> s<sup>-1</sup>

**4-methyl pent-3-en-2-one:** (58±1) Torr cm<sup>2</sup> s<sup>-1</sup>

**isophorone:** (46±3) Torr cm<sup>2</sup> s<sup>-1</sup>

The measurements by Lugg (1968) at 298 K are preferred. The given uncertainties reflect the differences between the measurements and estimations.

Last change in the preferred value: 11 July 2014

### References:

Lugg, G. A.: Diffusion coefficients of some organic and other vapors in air, *Anal. Chem.*, 40, 1072-1077, 1968.

## 5 Acids

Last evaluated: 11 July 2014

| Species                    | Reference  | $T$ (K) | $D_m(T)$ | $D_m(298)$ | $D_e(T)$ | $(D_e/D_m-1)$ (%) |
|----------------------------|------------|---------|----------|------------|----------|-------------------|
| formic acid                | Lugg, 1968 | 298     | 116      | 116        | 112      | -4                |
| acetic acid                | Lugg, 1968 | 298     | 94       | 94         | 89       | -5                |
| propanoic acid             | Lugg, 1968 | 298     | 72       | 72         | 76       | 5                 |
| n-butyric acid             | Lugg, 1968 | 298     | 59       | 59         | 67       | 14                |
| 2-methyl<br>propanoic acid | Lugg, 1968 | 298     | 60       | 60         | 67       | 12                |
| 3-methyl butanoic<br>acid  | Lugg, 1968 | 298     | 50       | 50         | 60       | 21                |
| hexanoic acid              | Lugg, 1968 | 298     | 46       | 46         | 56       | 22                |
| 4-methyl<br>pentanoic acid | Lugg, 1968 | 298     | 45       | 45         | 56       | 24                |

### Comments:

**formic acid, acetic acid, propanoic acid, n-butyric acid, 2-methyl butyric acid, 3-methyl butanoic acid, hexanoic acid, 4-methyl pentanoic acid:** The diffusivities of formic acid, acetic acid, propanoic acid, n-butyric acid, 2-methyl propanoic acid, 3-methyl butanoic acid, hexanoic acid, and 4-methyl pentanoic acid were measured at 298 K by Lugg (1968).

The differences between the measured and estimated diffusivities are ~5% for formic acid, acetic acid and propanoic acid, ~15% for n-butyric acid and iso-butyric acid, and ~25% for 3-methyl butanoic acid, hexanoic acid, and iso-hexanoic acid.

### Preferred value in N<sub>2</sub> (or air/O<sub>2</sub>) at 298 K:

**formic acid:** (116±4) Torr cm<sup>2</sup> s<sup>-1</sup>

**acetic acid:** (94±5) Torr cm<sup>2</sup> s<sup>-1</sup>

**propanoic acid:** (72±4) Torr cm<sup>2</sup> s<sup>-1</sup>

**n-butyric acid:** (59±8) Torr cm<sup>2</sup> s<sup>-1</sup>

**2-methyl propanoic acid:** (60±7) Torr cm<sup>2</sup> s<sup>-1</sup>

**3-methyl butanoic acid:** (50±10) Torr cm<sup>2</sup> s<sup>-1</sup>

**hexanoic acid:** (46±10) Torr cm<sup>2</sup> s<sup>-1</sup>

**4-methyl pentanoic acid:** (45±11) Torr cm<sup>2</sup> s<sup>-1</sup>

The preferred diffusivities of formic acid, acetic acid, propanoic acid, n-butyric acid, 2-methyl propanoic acid, 3-methyl butanoic acid, hexanoic acid, and 4-methyl pentanoic acid are based on the measurements at 298 K by Lugg (1968). The given uncertainties reflect the differences between the measured and estimated diffusivities.

[Last change in the preferred value: 11 July 2014](#)

**References:**

Lugg, G. A.: Diffusion coefficients of some organic and other vapors in air, *Anal. Chem.*, 40, 1072-1077, 1968.

## 6 Ethers

Last evaluated: 11 July 2014

| Species             | Reference  | $T$ (K) | $D_m(T)$ | $D_m(298)$ | $D_e(T)$ | $(D_e/D_m-1)$ (%) |
|---------------------|------------|---------|----------|------------|----------|-------------------|
| diethyl ether       | Lugg, 1968 | 298     | 70       | 70         | 69       | -1                |
| di-iso-propyl ether | Lugg, 1968 | 298     | 52       | 52         | 57       | 10                |
| di-n-butyl ether    | Lugg, 1968 | 298     | 41       | 41         | 49       | 20                |
| 1,4-dioxane         | Lugg, 1968 | 298     | 70       | 70         | 67       | -4                |

### Comments:

**diethyl ether, di-iso-propyl ether, di-n-butyl ether, and 1,4-dioxane:** The diffusivities of diethyl ether, di-iso-propyl ether, di-n-butyl ether, and 1,4-dioxane at 298 K were measured by Lugg (1968). The differences between the measured and estimated diffusivities are 1% for diethyl ether, 10% for di-iso-propyl ether, 20% for di-n-butyl ether, and 4% for 1,4-dioxane, respectively.

### Preferred value in N<sub>2</sub> (or air/O<sub>2</sub>) at 298 K:

**diethyl ether:**  $(70\pm 1)$  Torr cm<sup>2</sup> s<sup>-1</sup>

**di-iso-propyl ether:**  $(52\pm 5)$  Torr cm<sup>2</sup> s<sup>-1</sup>

**di-n-butyl ether:**  $(41\pm 8)$  Torr cm<sup>2</sup> s<sup>-1</sup>

**1,4-dioxane:**  $(70\pm 3)$  Torr cm<sup>2</sup> s<sup>-1</sup>

The preferred diffusivities of diethyl ether, di-iso-propyl ether, di-n-butyl ether, and 1,4-dioxane at 298 K are based on the measurement by Lugg (1968). The given uncertainties reflect the corresponding differences between the measured and estimated diffusivities.

Last change in the preferred value: 11 July 2014

### References:

Lugg, G. A.: Diffusion coefficients of some organic and other vapors in air, *Anal. Chem.*, 40, 1072-1077, 1968.

## 7 Esters

### 7.1 C<sub>2</sub>H<sub>4</sub>O<sub>2</sub> (methyl formate), C<sub>3</sub>H<sub>6</sub>O<sub>2</sub> (ethyl formate, methyl acetate)

Last evaluated: 12 July 2014

| Species        | Reference                    | T (K) | D <sub>m</sub> (T) | D <sub>m</sub> (298) | D <sub>e</sub> (T) | (D <sub>e</sub> /D <sub>m</sub> -1) (%) |
|----------------|------------------------------|-------|--------------------|----------------------|--------------------|-----------------------------------------|
| methyl formate | Lugg, 1968                   | 298   | 83                 | 83                   | 89                 | 7                                       |
| ethyl formate  | Lugg, 1968                   | 298   | 74                 | 74                   | 76                 | 2                                       |
|                | Nagata and<br>Hasegawa, 1970 | 344   | 100                | 77                   | 97                 | -3                                      |
|                |                              | 363   | 109                |                      | 107                | -2                                      |
|                |                              | 383   | 120                |                      | 117                | -3                                      |
|                |                              | 403   | 128                |                      | 128                | 0                                       |
| methyl acetate | Arnikar et al., 1967         | 353   | 107                | 80                   | 102                | -5                                      |
|                | Arnikar and Ghule,<br>1969   | 358   | 128                | 93                   | 104                | -19                                     |
|                | Lugg, 1968                   | 298   | 74                 | 74                   | 76                 | 2                                       |
|                | Nagata and                   | 364   | 130                | 92                   | 107                | -18                                     |
|                | Hasegawa, 1970               | 383   | 146                |                      | 117                | -20                                     |
|                |                              | 403   | 159                |                      | 128                | -19                                     |

#### Comments:

**methyl formate:** The diffusivity of methyl formate measured at 298 K by Lugg (1968) agrees well with the estimated value.

**ethyl formate:** The measured diffusivities of ethyl formate at 298 K by Lugg (1968) and at 344-403 K by Nagata and Hasegawa (1970) show good agreement with the estimated values. If extrapolated to 298 K, the measured diffusivity at 344 K by Nagata and Hasegawa (1970) agrees well with that measured by Lugg (1968).

**methyl acetate:** The measured diffusivities at 353 K by Arnikar et al. (1967) and at 298 K by Lugg (1968) show good agreement with the estimated values, while the differences between the diffusivities measured at 358 K by Arnikar and Ghule (1969) and at 364-403 K and estimated values are ~20%.

#### Preferred value in N<sub>2</sub> (or air/O<sub>2</sub>) at 298 K:

**methyl formate:** (83±6) Torr cm<sup>2</sup> s<sup>-1</sup>

The measured diffusivity at 298 K by Lugg (1968) is preferred, and the given uncertainty reflects the difference between the measurement and estimation.

**ethyl formate:** (76±2) Torr cm<sup>2</sup> s<sup>-1</sup>



The preferred diffusivity of ethyl formate, is the average of that measured at 298 K by Lugg (1968) and that extrapolated to 298 K from the measured value at 344 K by Nagata and Hasegawa (1970).

**methyl acetate:**  $(85 \pm 10)$  Torr  $\text{cm}^2 \text{s}^{-1}$

The preferred diffusivity, is the average of that measured at 298 K by Lugg (1968), those extrapolated to 298 K from those measured at 353 K by Arnikar et al. (1967), at 358 K by Arnikar and Ghule (1969), and at 364 K by Nagata and Hasegawa (1970).

[Last change in the preferred value: 12 July 2014](#)

#### **References:**

- Arnikar, H. J., and Ghule, H. M.: Electrodeless discharge as detector in the rapid determination of binary diffusion coefficient of gases, *Int. J. Electronics.*, 26, 159-162, 1969.
- Arnikar, H. J., Rao, T. S., and Karmarkar, K. H.: Electrodeless Discharge as Detector in Gas Chromatography m. Study of Inter-diffusion of Gases, *Int. J. Electronics.*, 22, 381-385, 1967.
- Lugg, G. A.: Diffusion coefficients of some organic and other vapors in air, *Anal. Chem.*, 40, 1072-1077, 1968.
- Nagata, I., and Hasegawa, T.: Gaseous interdiffusion coefficients, *J. Chem. Eng. Japan*, 3, 143-145, 1970.

## 7.2 C<sub>4</sub>H<sub>8</sub>O<sub>2</sub> (propyl formate, ethyl acetate, methyl propionate)

Last evaluated: 12 July 2014

| Species           | Reference       | T (K) | D <sub>m</sub> (T) | D <sub>m</sub> (298) | D <sub>e</sub> (T) | (D <sub>e</sub> /D <sub>m</sub> -1) (%) |
|-------------------|-----------------|-------|--------------------|----------------------|--------------------|-----------------------------------------|
| propyl formate    | Lugg, 1968      | 298   | 63                 | 63                   | 67                 | 6                                       |
| ethyl acetate     | Gilliland, 1934 | 299   | 66                 | 66                   | 67                 | 1                                       |
|                   |                 | 312   | 71                 |                      | 72                 | 1                                       |
|                   |                 | 332   | 81                 |                      | 81                 | 1                                       |
|                   | Lugg, 1968      | 298   | 65                 | 65                   | 67                 | 2                                       |
|                   | Katan, 1969     | 295   | 65                 | 66                   | 66                 | 2                                       |
| methyl propionate | Lugg, 1968      | 298   | 66                 | 66                   | 67                 | 2                                       |
|                   |                 |       |                    |                      |                    |                                         |

### Comments:

**propyl formate, methyl propionate:** The diffusivities of propyl formate and methyl propionate measured at 298 K by Lugg (1968) agrees well with the estimated values.

**ethyl acetate:** The measured diffusivities at 299-332 K by Gilliland (1934), at 298 K by Lugg (1968), and at 295 K by Katan (1969) show excellent agreement with estimated values, while the difference between the measured value at 355 K by Arnikaar and Ghule (1969) and the estimated one is 13%. If extrapolated to 298 K, the measurement at 355 K by Arnikaar and Ghule (1969) agrees well with all the other measurements at 295-299 K.

### Preferred value in N<sub>2</sub> (or air/O<sub>2</sub>) at 298 K:

**propyl formate:** (63±4) Torr cm<sup>2</sup> s<sup>-1</sup>

**propyl formate:** (66±1) Torr cm<sup>2</sup> s<sup>-1</sup>

The measured diffusivities of propyl formate and methyl propionate at 298 K by Lugg (1968) are preferred, and the given uncertainties reflect the corresponding differences between the measurements and estimations.

**propyl formate:** (67±6) Torr cm<sup>2</sup> s<sup>-1</sup>

The preferred diffusivity, is the average of that measured at 298 K by Lugg (1968) and those extrapolated to 298 K from those measured at 299 K by Gilliland (1934), at 298 K by Katan (1969), and at 355 K by Arnikaar and Ghule (1969).

Last change in the preferred value: 12 July 2014

### References:

- Arnikar, H. J., and Ghule, H. M.: Electrodeless discharge as detector in the rapid determination of binary diffusion coefficient of gases, *Int. J. Electronics.*, 26, 159-162, 1969.
- Gilliland, E. R.: Diffusion Coefficients in Gaseous Systems, *Ind. Eng. Chem.*, 26, 681-685, 1934.
- Katan, T.: Diffusion Coefficients of Vapors Measured with a Moving Boundary, *J. Chem. Phys.*, 50, 233-238, 1969.
- Lugg, G. A.: Diffusion coefficients of some organic and other vapors in air, *Anal. Chem.*, 40, 1072-1077, 1968.

### 7.3 C<sub>5</sub>H<sub>10</sub>O<sub>2</sub> (2-methylpropyl formate, n-propyl acetate, 2-methylethyl acetate, ethyl propionate, methyl n-butyrate, methyl isobutyrate)

Last evaluated: 12 July 2014

| Species                | Reference                 | T (K) | D <sub>m</sub> (T) | D <sub>m</sub> (298) | D <sub>e</sub> (T) | (D <sub>e</sub> /D <sub>m</sub> -1) (%) |
|------------------------|---------------------------|-------|--------------------|----------------------|--------------------|-----------------------------------------|
| 2-methylpropyl formate | Lugg, 1968                | 298   | 60                 | 60                   | 60                 | 1                                       |
| n-propyl acetate       | Lugg, 1968                | 298   | 58                 | 58                   | 60                 | 3                                       |
| 2-methylethyl acetate  | Lugg, 1968                | 298   | 59                 | 59                   | 60                 | 3                                       |
| ethyl propionate       | Fairbanks and Wilke, 1950 | 301   | 64                 | 64                   | 62                 | -3                                      |
|                        | Lugg, 1968                | 298   | 58                 | 58                   | 60                 | 3                                       |
| methyl n-butyrate      | Lugg, 1968                | 298   | 57                 | 57                   | 60                 | 6                                       |
| methyl isobutyrate     | Lugg, 1968                | 298   | 57                 | 57                   | 60                 | 6                                       |

#### Comments:

**2-methylpropyl formate, n-propyl acetate, 2-methylethyl acetate, methyl n-butyrate, methyl isobutyrate:** The diffusivities of 2-methylpropyl formate, n-propyl acetate, 2-methylethyl acetate, methyl n-butyrate, and methyl isobutyrate measured by Lugg (1968) show excellent agreement with the estimated values.

**ethyl propionate:** The diffusivities measured at 301 K by Fairbank and Wilke (1950) and at 298 K by Lugg (1968) are in good agreement, and both measurements agree very well with the estimations.

#### Preferred value in N<sub>2</sub> (or air/O<sub>2</sub>) at 298 K:

**2-methylpropyl formate:** (60±1) Torr cm<sup>2</sup> s<sup>-1</sup>

**n-propyl acetate:** (58±2) Torr cm<sup>2</sup> s<sup>-1</sup>

**2-methylethyl acetate:** (59±1) Torr cm<sup>2</sup> s<sup>-1</sup>

**methyl n-butyrate:** (57±3) Torr cm<sup>2</sup> s<sup>-1</sup>

**methyl isobutyrate:** (57±3) Torr cm<sup>2</sup> s<sup>-1</sup>

The diffusivities of 2-methylpropyl formate, n-propyl acetate, 2-methylethyl acetate, methyl n-butyrate, and methyl isobutyrate measured by Lugg (1968) are preferred, and the given uncertainties reflect the corresponding differences between the measured and estimated diffusivities.

**ethyl propionate:** (61±3) Torr cm<sup>2</sup> s<sup>-1</sup>

The preferred diffusivity, is the average of that measured at 298 K by Lugg (1968) and that extrapolated to 298 K from that measured at 303 K by Fairbank and Wilke (1950).

[Last change in the preferred value: 12 July 2014](#)

**References:**

Fairbanks, D. F., and Wilke, C. R.: Diffusion Coefficients in Multicomponent Gas Mixtures, *Ind. Eng. Chem.*, 42, 471-475, 1950.

Lugg, G. A.: Diffusion coefficients of some organic and other vapors in air, *Anal. Chem.*, 40, 1072-1077, 1968.

## 7.4 C<sub>6</sub>H<sub>12</sub>O<sub>2</sub> (n-pentyl formate, iso-pentyl formate, n-butyl acetate, 2-methylpropyl acetate, ethyl n-butyrate, ethyl isobutyrate, methyl n-pentanoate)

Last evaluated: 12 July 2014

| Species                | Reference  | T (K) | D <sub>m</sub> (T) | D <sub>m</sub> (298) | D <sub>e</sub> (T) | (D <sub>e</sub> /D <sub>m</sub> -1) (%) |
|------------------------|------------|-------|--------------------|----------------------|--------------------|-----------------------------------------|
| n-pentyl formate       | Lugg, 1968 | 298   | 50                 | 50                   | 56                 | 11                                      |
| iso-pentyl formate     | Lugg, 1968 | 298   | 51                 | 51                   | 56                 | 9                                       |
| n-butyl acetate        | Lugg, 1968 | 298   | 51                 | 51                   | 56                 | 10                                      |
| 2-methylpropyl acetate | Lugg, 1968 | 298   | 52                 | 52                   | 56                 | 7                                       |
| ethyl n-butyrate       | Lugg, 1968 | 298   | 51                 | 51                   | 56                 | 10                                      |
| ethyl iso-butyrate     | Lugg, 1968 | 298   | 51                 | 51                   | 56                 | 9                                       |
| methyl n-pentanoate    | Lugg, 1968 | 298   | 51                 | 51                   | 56                 | 11                                      |

### Comments:

**n-pentyl formate, iso-pentyl formate, n-butyl acetate, 2-methylpropyl acetate, ethyl n-butyrate, ethyl iso-butyrate, methyl n-pentanoate:** The differences between the measured (Lugg, 1968) and estimated diffusivities of n-pentyl formate, iso-pentyl formate, n-butyl acetate, 2-methylpropyl acetate, ethyl n-butyrate, ethyl iso-butyrate, and methyl n-pentanoate are ~10%.

### Preferred value in N<sub>2</sub> (or air/O<sub>2</sub>) at 298 K:

**n-pentyl formate:** (50±6) Torr cm<sup>2</sup> s<sup>-1</sup>

**iso-pentyl formate:** (51±5) Torr cm<sup>2</sup> s<sup>-1</sup>

**n-butyl acetate:** (51±5) Torr cm<sup>2</sup> s<sup>-1</sup>

**2-methylpropyl acetate:** (52±4) Torr cm<sup>2</sup> s<sup>-1</sup>

**ethyl n-butyrate:** (51±5) Torr cm<sup>2</sup> s<sup>-1</sup>

**ethyl iso-butyrate:** (51±5) Torr cm<sup>2</sup> s<sup>-1</sup>

**methyl n-pentanoate:** (51±5) Torr cm<sup>2</sup> s<sup>-1</sup>

The diffusivities of n-pentyl formate, iso-pentyl formate, n-butyl acetate, 2-methylpropyl acetate, ethyl n-butyrate, ethyl iso-butyrate, and methyl n-pentanoate at 298 K measured by Lugg (1968) are preferred, and the given uncertainties reflect the corresponding differences between the measured and estimated diffusivities.

Last change in the preferred value: 12 July 2014

**References:**

Lugg, G. A.: Diffusion coefficients of some organic and other vapors in air, *Anal. Chem.*,  
40, 1072-1077, 1968.

**7.5 C<sub>7</sub>H<sub>14</sub>O<sub>2</sub> (n-pentyl acetate, n-butyl propionate, iso-butyl propionate, n-propyl n-butyrate, n-propyl iso-butyrate, iso-propyl iso-butyrate, ethyl n-pentanoate, methyl hexanonate)**

Last evaluated: 12 July 2014

| Species                 | Reference  | <i>T</i> (K) | <i>D<sub>m</sub></i> ( <i>T</i> ) | <i>D<sub>m</sub></i> (298) | <i>D<sub>e</sub></i> ( <i>T</i> ) | ( <i>D<sub>e</sub></i> / <i>D<sub>m</sub></i> -1) (%) |
|-------------------------|------------|--------------|-----------------------------------|----------------------------|-----------------------------------|-------------------------------------------------------|
| n-pentyl acetate        | Lugg, 1968 | 298          | 46                                | 46                         | 52                                | 12                                                    |
| n-butyl propionate      | Lugg, 1968 | 298          | 46                                | 46                         | 52                                | 13                                                    |
| iso-butyl propionate    | Lugg, 1968 | 298          | 46                                | 46                         | 52                                | 12                                                    |
| n-propyl n-butyrate     | Lugg, 1968 | 298          | 46                                | 46                         | 52                                | 12                                                    |
| n-propyl iso-butyrate   | Lugg, 1968 | 298          | 47                                | 47                         | 52                                | 10                                                    |
| iso-propyl iso-butyrate | Lugg, 1968 | 298          | 48                                | 48                         | 52                                | 7                                                     |
| ethyl n-pentanoate      | Lugg, 1968 | 298          | 46                                | 46                         | 52                                | 13                                                    |
| methyl n-hexanonate     | Lugg, 1968 | 298          | 46                                | 46                         | 52                                | 12                                                    |

**Comments:**

**n-pentyl acetate, n-butyl propionate, iso-butyl propionate, n-propyl n-butyrate, n-propyl iso-butyrate, iso-propyl iso-butyrate, ethyl n-pentanoate, methyl hexanonate:** The differences between the measured (Lugg, 1968) and estimated diffusivities of n-pentyl acetate, n-butyl propionate, iso-butyl propionate, n-propyl n-butyrate, n-propyl iso-butyrate, iso-propyl iso-butyrate, ethyl-n-pentanoate, and methyl n-hexanonate are ~10%.

**Preferred value in N<sub>2</sub> (or air/O<sub>2</sub>) at 298 K:**

**n-pentyl acetate:** (46±6) Torr cm<sup>2</sup> s<sup>-1</sup>

**n-butyl propionate:** (46±6) Torr cm<sup>2</sup> s<sup>-1</sup>

**iso-butyl propionate:** (46±6) Torr cm<sup>2</sup> s<sup>-1</sup>

**n-propyl n-butyrate:** (46±6) Torr cm<sup>2</sup> s<sup>-1</sup>

**n-propyl iso-butyrate:** (47±5) Torr cm<sup>2</sup> s<sup>-1</sup>

**iso-propyl iso-butyrate:** (48±4) Torr cm<sup>2</sup> s<sup>-1</sup>

**ethyl n-pentanoate:** (46±6) Torr cm<sup>2</sup> s<sup>-1</sup>

**methyl n-hexanonate:** (46±6) Torr cm<sup>2</sup> s<sup>-1</sup>

The diffusivities of n-pentyl acetate, n-butyl propionate, iso-butyl propionate, n-propyl n-butyrate, n-propyl iso-butyrate, iso-propyl iso-butyrate, ethyl-n-pentanoate, and methyl n-hexanonate at 298 K measured by Lugg (1968) are preferred, and the given



uncertainties reflect the corresponding differences between the measured and estimated diffusivities.

[Last change in the preferred value: 12 July 2014](#)

**References:**

Lugg, G. A.: Diffusion coefficients of some organic and other vapors in air, *Anal. Chem.*, 40, 1072-1077, 1968.

## 7.6 C<sub>8</sub>H<sub>16</sub>O<sub>2</sub> (n-pentyl acetate, n-butyl propionate, iso-butyl propionate, n-propyl n-butyrate, n-propyl iso-butyrate, iso-propyl iso-butyrate, ethyl n-pentanoate, methyl hexanoate)

Last evaluated: 12 July 2014

| Species                | Reference  | T (K) | D <sub>m</sub> (T) | D <sub>m</sub> (298) | D <sub>e</sub> (T) | (D <sub>e</sub> /D <sub>m</sub> -1) (%) |
|------------------------|------------|-------|--------------------|----------------------|--------------------|-----------------------------------------|
| n-pentyl propionate    | Lugg, 1968 | 298   | 42                 | 42                   | 48                 | 13                                      |
| iso-butyl n-butyrate   | Lugg, 1968 | 298   | 42                 | 42                   | 48                 | 13                                      |
| iso-butyl iso-butyrate | Lugg, 1968 | 298   | 42                 | 42                   | 48                 | 15                                      |
| iso-proyl n-pentanoate | Lugg, 1968 | 298   | 42                 | 42                   | 48                 | 14                                      |

### Comments:

**n-pentyl propionate, iso-butyl n-butyrate, iso-butyl iso-butyrate, iso-proyl n-pentanoate:**

The differences between the measured (Lugg, 1968) and estimated diffusivities of n-pentyl propionate, iso-butyl n-butyrate, iso-butyl iso-butyrate, and iso-proyl n-pentanoate are ~15%.

### Preferred value in N<sub>2</sub> (or air/O<sub>2</sub>) at 298 K:

**n-pentyl propionate:** (42±6) Torr cm<sup>2</sup> s<sup>-1</sup>

**iso-butyl n-butyrate:** (42±6) Torr cm<sup>2</sup> s<sup>-1</sup>

**iso-butyl iso-butyrate:** (42±6) Torr cm<sup>2</sup> s<sup>-1</sup>

**iso-proyl n-pentanoate:** (42±6) Torr cm<sup>2</sup> s<sup>-1</sup>

The diffusivities of n-pentyl propionate, iso-butyl n-butyrate, iso-butyl iso-butyrate, and iso-proyl n-pentanoate at 298 K measured by Lugg (1968) are preferred, and the given uncertainties reflect the corresponding differences between the measured and estimated diffusivities.

Last change in the preferred value: 12 July 2014

### References:

Lugg, G. A.: Diffusion coefficients of some organic and other vapors in air, *Anal. Chem.*, 40, 1072-1077, 1968.

## 7.7 C<sub>9</sub>H<sub>19</sub>O<sub>2</sub> (m-pentyl n-butyrate, n-pentyl iso-butyrate, iso-butyl n-pentanoate) and C<sub>9</sub>H<sub>10</sub>O<sub>2</sub> (benzyl acetate)

Last evaluated: 12 July 2014

| Species                   | Reference  | T (K) | D <sub>m</sub> (T) | D <sub>m</sub> (298) | D <sub>e</sub> (T) | (D <sub>e</sub> /D <sub>m</sub> -1) (%) |
|---------------------------|------------|-------|--------------------|----------------------|--------------------|-----------------------------------------|
| n-pentyl<br>n-butyrate    | Lugg, 1968 | 298   | 37                 | 37                   | 46                 | 25                                      |
| n-pentyl<br>iso-butyrate  | Lugg, 1968 | 298   | 38                 | 38                   | 46                 | 22                                      |
| iso-butyl<br>n-pentanoate | Lugg, 1968 | 298   | 38                 | 38                   | 46                 | 23                                      |
| benzyl acetate            | Lugg, 1968 | 298   | 46                 | 46                   | 50                 | 10                                      |

### Comments:

#### **n-pentyl n-butyrate, n-pentyl iso-butyrate, iso-butyl n-pentanoate, benzyl acetate:**

The differences between the measured (Lugg, 1968) and estimated diffusivities at 298 K are 25% for n-pentyl n-butyrate, 22% for n-pentyl iso-butyrate, 23% for iso-butyl n-pentanoate, and 10% for benzyl acetate.

### Preferred value in N<sub>2</sub> (or air/O<sub>2</sub>) at 298 K:

**n-pentyl n-butyrate:** (37±9) Torr cm<sup>2</sup> s<sup>-1</sup>

**n-pentyl iso-butyrate:** (38±8) Torr cm<sup>2</sup> s<sup>-1</sup>

**iso-butyl n-pentanoate:** (38±8) Torr cm<sup>2</sup> s<sup>-1</sup>

**benzyl acetate:** (46±4) Torr cm<sup>2</sup> s<sup>-1</sup>

The diffusivities of n-pentyl n-butyrate, n-pentyl iso-butyrate, iso-butyl n-pentanoate, and benzyl acetate at 298 K measured by Lugg (1968) are preferred, and the given uncertainties reflect the corresponding differences between the measured and estimated diffusivities.

Last change in the preferred value: 12 July 2014

### References:

Lugg, G. A.: Diffusion coefficients of some organic and other vapors in air, *Anal. Chem.*, 40, 1072-1077, 1968.

**7.8 C<sub>20</sub>H<sub>38</sub>O<sub>4</sub> (dipentyl sebacate), C<sub>12</sub>H<sub>14</sub>O<sub>4</sub> (diethyl phthalate), C<sub>16</sub>H<sub>22</sub>O<sub>4</sub> (di-n-butyl phthalate), C<sub>24</sub>H<sub>38</sub>O<sub>4</sub> (di-2-ethylhexyl phthalate)**

Last evaluated: 12 July 2014

| Species                   | Reference               | <i>T</i> (K) | <i>D<sub>m</sub></i> (T) | <i>D<sub>m</sub></i> (298) | <i>D<sub>e</sub></i> (T) | ( <i>D<sub>e</sub></i> / <i>D<sub>m</sub></i> -1) (%) |
|---------------------------|-------------------------|--------------|--------------------------|----------------------------|--------------------------|-------------------------------------------------------|
| dipentyl sebacate         | Monchick and            | 298          | 18                       | 18                         | 30                       | 67                                                    |
|                           | Reiss, 1954             | 308          | 19                       |                            | 32                       | 66                                                    |
| diethyl phthalate         | Lugg, 1968              | 298          | 38                       | 38                         | 42                       | 11                                                    |
| di-n-butyl phthalate      | Birks and Vradley, 1949 | 288          | 26                       |                            | 34                       | 32                                                    |
|                           |                         | 293          | 29                       |                            | 35                       | 19                                                    |
|                           |                         | 298          | 32                       | 32                         | 36                       | 14                                                    |
|                           |                         | 303          | 32                       |                            | 37                       | 14                                                    |
|                           |                         | 308          | 32                       |                            | 38                       | 18                                                    |
|                           |                         | 313          | 36                       |                            | 39                       | 8                                                     |
|                           | Lugg, 1968              | 298          | 32                       | 32                         | 36                       | 13                                                    |
| di-2-ethylhexyl phthalate | Lugg, 1968              | 298          | 26                       | 26                         | 29                       | 13                                                    |

**Comments:**

**dipentyl sebacate:** The diffusivities of dipentyl sebacate were measured at 298 and 308 K by Monchick and Reiss (1954), and the reported diffusivities are ~66% lower than the estimated values.

**diethyl phthalate, di-2-ethylhexyl phthalate:** The diffusivities of diethyl phthalate and di-2-ethylhexyl phthalate were measured by Lugg (1968) at 298 K. The measured values are 11% lower than the estimated value for diethyl phthalate and 13% for di-2-ethylhexyl phthalate.

**di-n-butyl phthalate:** The diffusivities of di-n-butyl phthalate were measured over 288-313 K by Birks and Vradley (1949) and at 298 K by Lugg (1968). The two measurements show excellent agreement at 298 K. The differences between the measured and estimated values appears to decrease with increasing temperature.

**Preferred value in N<sub>2</sub> (or air/O<sub>2</sub>) at 298 K:**

**dipentyl sebacate:** no recommendation

The only available measurement (Monchick and Reiss, 1954) is ~66% lower than the estimated larger than the estimated value. Because the difference between the measured and estimated diffusivities of dipentyl sebacate is much larger than those for most other species, no preferred value is recommended.

**diethyl phthalate:** (38±4) Torr cm<sup>2</sup> s<sup>-1</sup>

**di-2-ethylhexyl phthalate:**  $(26\pm 3)$  Torr  $\text{cm}^2 \text{s}^{-1}$

The diffusivities of diethyl phthalate and di-2-ethylhexyl phthalate at 298 K measured by Lugg (1968) are preferred, and the given uncertainties reflect the corresponding differences between the measured and estimated diffusivities.

**di-n-butyl phthalate:**  $(32\pm 4)$  Torr  $\text{cm}^2 \text{s}^{-1}$

The preferred diffusivity at 298 K is based on the two measured diffusivities of di-n-butyl phthalate at 298 K (Birks and Vraley, 1949; Lugg, 1968). Though the two measurements are in excellent agreement, an uncertainty of  $\pm 4$  Torr  $\text{cm}^2 \text{s}^{-1}$  is given to reflect the difference between the measured and estimated diffusivities.

[Last change in the preferred value: 12 July 2014](#)

#### **References:**

- Birks, J., and Bradley, R. S.: The Rate of Evaporation of Droplets. II. The Influence of Changes of Temperature and of the Surrounding Gas on the Rate of Evaporation of Drops of Di-n-butyl Phthalate, *Proc. Roy. Soc. A*, 198, 226-239, 1949.
- Monchick, L., and Reiss, H.: Studies of Evaporation of Small Drops, *J. Chem. Phys.*, 22, 831-836, 1954.
- Lugg, G. A.: Diffusion coefficients of some organic and other vapors in air, *Anal. Chem.*, 40, 1072-1077, 1968.

## 8 Multifunctional species

### 8.1 C<sub>3</sub>H<sub>8</sub>O<sub>2</sub> (2-methoxy ethanol), C<sub>4</sub>H<sub>10</sub>O<sub>2</sub> (2-ethoxy ethanol), C<sub>4</sub>H<sub>10</sub>O<sub>3</sub> (diethyl glycol), C<sub>6</sub>H<sub>14</sub>O<sub>4</sub> (triethyl glycol), C<sub>6</sub>H<sub>14</sub>O<sub>3</sub> (dioxitol)

Last evaluated: 11 July 2014

| Species           | Reference  | T (K) | D <sub>m</sub> (T) | D <sub>m</sub> (298) | D <sub>e</sub> (T) | (D <sub>e</sub> /D <sub>m</sub> -1) (%) |
|-------------------|------------|-------|--------------------|----------------------|--------------------|-----------------------------------------|
| 2-methoxy ethanol | Lugg, 1968 | 298   | 67                 | 67                   | 74                 | 10                                      |
| 2-ethoxy ethanol  | Lugg, 1968 | 298   | 60                 | 60                   | 65                 | 9                                       |
| diethyl glycol    | Lugg, 1968 | 298   | 55                 | 55                   | 63                 | 14                                      |
| triethyl glycol   | Lugg, 1968 | 298   | 45                 | 45                   | 55                 | 23                                      |
| dioxitol          | Lugg, 1968 | 298   | 46                 | 46                   | 53                 | 14                                      |

#### Comments:

**2-methoxy ethanol, 2-ethoxy ethanol, diethyl glycol, triethyl glycol, and dioxitol:** The diffusivities of 2-methoxy ethanol, 2-ethoxy ethanol, diethyl glycol, triethyl glycol, and dioxitol were measured at 298 K by Lugg (1968). The difference between the measured and estimated diffusivities are 10% for 2-methoxy ethanol, 9% for 2-ethoxy ethanol, 14% for diethyl glycol, 23% for triethyl glycol, and 14% for dioxitol, respectively.

#### Preferred value in N<sub>2</sub> (or air/O<sub>2</sub>) at 298 K:

**2-methoxy ethanol:** (67±7) Torr cm<sup>2</sup> s<sup>-1</sup>

**2-ethoxy ethanol:** (60±5) Torr cm<sup>2</sup> s<sup>-1</sup>

**diethyl glycol:** (55±8) Torr cm<sup>2</sup> s<sup>-1</sup>

**triethyl glycol:** (45±10) Torr cm<sup>2</sup> s<sup>-1</sup>

**dioxitol:** (46±7) Torr cm<sup>2</sup> s<sup>-1</sup>

The measured diffusivities of 2-methoxy ethanol, 2-ethoxy ethanol, diethyl glycol, triethyl glycol, and dioxitol at 298 K by Lugg (1968) are preferred. The given uncertainties reflect the corresponding differences between the measured and estimated diffusivities.

Last change in the preferred value: 11 July 2014

#### References:

Lugg, G. A.: Diffusion coefficients of some organic and other vapors in air, *Anal. Chem.*, 40, 1072-1077, 1968.



## 8.2 C<sub>5</sub>H<sub>4</sub>O<sub>2</sub> (furfural), C<sub>6</sub>H<sub>12</sub>O<sub>2</sub> (4-hydroxyl-4-methyl-2-pentanone), C<sub>6</sub>H<sub>12</sub>O<sub>3</sub> (2-ethoxy ethyl acetate), C<sub>8</sub>H<sub>8</sub>O<sub>3</sub> (methyl salicylate)

Last evaluated: 11 July 2014

| Species                        | Reference               | T (K) | D <sub>m</sub> (T) | D <sub>m</sub> (298) | D <sub>e</sub> (T) | (D <sub>e</sub> /D <sub>m</sub> -1) (%) |
|--------------------------------|-------------------------|-------|--------------------|----------------------|--------------------|-----------------------------------------|
| furfural                       | Brookfield et al., 1947 | 298   | 66                 | 66                   | 64                 | -3                                      |
|                                |                         | 323   | 82                 |                      | 74                 | -10                                     |
| 4-hydroxy-4-methyl-2-pentanone | Lugg, 1968              | 298   | 49                 | 49                   | 56                 | 14                                      |
| 2-ethoxy ethyl acetate         | Lugg, 1968              | 298   | 46                 | 46                   | 54                 | 16                                      |
| methyl salicylate              | Brookfield et al., 1947 | 298   | 62                 | 62                   | 52                 | -17                                     |
|                                |                         | 323   | 108                |                      | 60                 | -44                                     |

### Comments:

**furfural:** The measured diffusivities of furfural by Brookfield et al. (1947) are 3% larger than the estimated value at 298 K and 10% at 323 K.

**4-hydroxyl-4-methyl-2-pentanone, 2-ethoxy ethyl acetate:** The measured diffusivities of 4-hydroxyl-4-methyl-2-pentanone and 2-ethoxy ethyl acetate at 298 K by Lugg (298) are 14% and 16% smaller than the estimated values, respectively.

**methyl salicylate:** The measured diffusivities of furfural by Brookfield et al. (1947) are 17% larger than the estimated value at 298 K and 44% at 323 K.

### Preferred value in N<sub>2</sub> (or air/O<sub>2</sub>) at 298 K:

**furfural:** (66±4) Torr cm<sup>2</sup> s<sup>-1</sup>

The measurement by Brookfield et al. (1947) is preferred, and the given uncertainty reflects the difference between the measured and estimated diffusivities at 298 K.

**4-hydroxyl-4-methyl-2-pentanone:** (49±7) Torr cm<sup>2</sup> s<sup>-1</sup>

**2-ethoxy ethyl acetate:** (46±8) Torr cm<sup>2</sup> s<sup>-1</sup>

The measurements at 298 K by Lugg (1968) are preferred, and the given uncertainties reflect the differences between the measured and estimated diffusivities at 298 K.

**methyl salicylate:** (62±10) Torr cm<sup>2</sup> s<sup>-1</sup>

The measurement by Brookfield et al. (1947) is preferred, and the given uncertainty reflects the difference between the measured and estimated diffusivities at 298 K.

Last change in the preferred value: 11 July 2014

**References:**

- Brookfield, K. J., Fitzpatrick, H. D. N., Jackson, J. F., Matthews, J. B., and Moelwyn-Hughes, E. A.: The Escape of Molecules from a Plane Surface into a Still Atmosphere, *Proc. Roy. Soc. A*, 190, 59-67, 1947.
- Lugg, G. A.: Diffusion coefficients of some organic and other vapors in air, *Anal. Chem.*, 40, 1072-1077, 1968.

## 9 N-containing species

### 9.1 C<sub>4</sub>H<sub>11</sub>N (n-butylamine, iso-butylamine, and diethylamine), C<sub>2</sub>H<sub>8</sub>N<sub>2</sub> (ethyl diamine), C<sub>3</sub>H<sub>7</sub>NO (dimethyl formamide), C<sub>6</sub>H<sub>15</sub>N (triethylamine), C<sub>12</sub>H<sub>12</sub>N<sub>2</sub> (benzidine)

Last evaluated: 11 July 2014

| Species            | Reference  | <i>T</i> (K) | <i>D<sub>m</sub></i> ( <i>T</i> ) | <i>D<sub>m</sub></i> (298) | <i>D<sub>e</sub></i> ( <i>T</i> ) | ( <i>D<sub>e</sub></i> / <i>D<sub>m</sub></i> -1) (%) |
|--------------------|------------|--------------|-----------------------------------|----------------------------|-----------------------------------|-------------------------------------------------------|
| n-butylamine       | Lugg, 1968 | 298          | 66                                | 66                         | 69                                | 4                                                     |
| iso-butylamine     | Lugg, 1968 | 298          | 68                                | 68                         | 69                                | 1                                                     |
| diethylamine       | Lugg, 1968 | 298          | 75                                | 75                         | 69                                | -9                                                    |
| ethyl diamine      | Lugg, 1968 | 298          | 77                                | 77                         | 85                                | 11                                                    |
| dimethyl formamide | Lugg, 1968 | 298          | 74                                | 74                         | 76                                | 3                                                     |
| triethylamine      | Lugg, 1968 | 298          | 57                                | 57                         | 57                                | -1                                                    |
| benzidine          | Mack, 1925 | 372          | 42                                | 29                         | 68                                | 61                                                    |

#### Comments:

**n-butylamine, iso-butylamine, diethylamine, ethyl diamine, dimethyl formamide and triethylamine:** The diffusivities of n-butylamine, iso-butylamine, diethylamine, ethyl diamine, dimethyl formamide and triethylamine at 298 K were measured by Lugg (1968). Differences between the measured and estimated diffusivities are ~10% or smaller.

**benzidine:** The diffusivity of benzidine was measured at 372 K by Mack (1925). The measured diffusivity was 61% lower than the estimated one.

#### Preferred value in N<sub>2</sub> (or air/O<sub>2</sub>) at 298 K:

**n-butylamine:** (66±3) Torr cm<sup>2</sup> s<sup>-1</sup>

**iso-butylamine:** (68±1) Torr cm<sup>2</sup> s<sup>-1</sup>

**diethylamine:** (75±6) Torr cm<sup>2</sup> s<sup>-1</sup>

**ethyl diamine:** (77±8) Torr cm<sup>2</sup> s<sup>-1</sup>

**dimethyl formamide:** (74±2) Torr cm<sup>2</sup> s<sup>-1</sup>

**triethylamine:** (57±1) Torr cm<sup>2</sup> s<sup>-1</sup>

The preferred diffusivities of n-butylamine, iso-butylamine, diethylamine, ethyl diamine, dimethyl formamide and triethylamine at 298 K are based on the measurement by Lugg (1968). The given uncertainties reflect the corresponding differences between the measured and estimated diffusivities.

**benzidine:** no recommendation

Because the measured diffusivity reported by the only study (Mack, 1925) differs largely (by ~60%) from the estimated value, no preferred value is recommended.

Last change in the preferred value: 11 July 2014

**References:**

Lugg, G. A.: Diffusion coefficients of some organic and other vapors in air, *Anal. Chem.*, 40, 1072-1077, 1968.

Mack, E.: Average cross-sectional areas of molecules by gaseous diffusion methods, *J. Am. Chem. Soc.*, 47, 2468-2482, 1925.

## 9.2 C<sub>6</sub>H<sub>7</sub>N<sub>2</sub> (aniline), C<sub>6</sub>H<sub>5</sub>NO<sub>2</sub> (nitrobenzene)

Last evaluated: 11 July 2014

| Species      | Reference           | T (K) | D <sub>m</sub> (T) | D <sub>m</sub> (298) | D <sub>e</sub> (T) | (D <sub>e</sub> /D <sub>m</sub> -1) (%) |
|--------------|---------------------|-------|--------------------|----------------------|--------------------|-----------------------------------------|
| aniline      | Mack, 1925          | 298   | 55                 | 55                   | 63                 | 14                                      |
|              | Gilliland, 1934     | 299   | 56                 | 56                   | 63                 | 12                                      |
|              |                     | 312   | 60                 |                      | 68                 | 13                                      |
|              |                     | 332   | 68                 |                      | 76                 | 11                                      |
|              | Lugg, 1968          | 298   | 56                 | 56                   | 63                 | 13                                      |
| nitrobenzene | Lee and Wilke, 1954 | 298   | 65                 | 65                   | 62                 | -5                                      |
|              | Lugg, 1968          | 298   | 55                 | 55                   | 62                 | 13                                      |

### Comments:

**aniline:** The diffusivities of aniline at 298-299 K, measured by Mack (1925), Gilliland (1934) and Lugg (1968) show excellent agreement. The measured diffusivities from 298-332 K are ~10% lower than the estimated ones.

**nitrobenzene:** Lee and Wilke (1954) and Lugg (1968) measured the diffusivity of nitrobenzene at 298 K. Two measurements are in good agreement, and the differences between the measured and estimated diffusivities are ~10%.

### Preferred value in N<sub>2</sub> (or air/O<sub>2</sub>) at 298 K:

**aniline:** (56±6) Torr cm<sup>2</sup> s<sup>-1</sup>

The preferred diffusivity of aniline at 298 K, (56±6) Torr cm<sup>2</sup> s<sup>-1</sup>, is based on the measurements by Mack (1925), Gilliland (1934) and Lugg (1968). The given uncertainty reflects the differences between measured and estimated diffusivities.

**nitrobenzene:** (60±5) Torr cm<sup>2</sup> s<sup>-1</sup>

The preferred diffusivity of nitrobenzene at 298 K, (60±5) Torr cm<sup>2</sup> s<sup>-1</sup>, is the average of those reported by Lee and Wilke (1954) and Lugg (1968).

Last change in the preferred value: 11 July 2014

### References:

Lee, C. Y., and Wilke, C. R.: Measurements of vapor diffusion coefficient, *Ind. Eng. Chem.*, 46, 2381-2387, 1954.

Lugg, G. A.: Diffusion coefficients of some organic and other vapors in air, *Anal. Chem.*, 40, 1072-1077, 1968.

Mack, E.: Average cross-sectional areas of molecules by gaseous diffusion methods, *J. Am. Chem. Soc.*, 47, 2468-2482, 1925.

### 9.3 HCN, C<sub>3</sub>H<sub>3</sub>N (acrylonitrile), C<sub>6</sub>H<sub>7</sub>NO<sub>2</sub> (ethyl cyanoacrylate), C<sub>7</sub>H<sub>5</sub>N (benzonitrile), C<sub>5</sub>H<sub>5</sub>N (pyridine), C<sub>5</sub>H<sub>11</sub>N (piperidine)

Last evaluated: 11 July 2014

| Species             | Reference              | T (K) | D <sub>m</sub> (T) | D <sub>m</sub> (298) | D <sub>e</sub> (T) | (D <sub>e</sub> /D <sub>m</sub> -1) (%) |
|---------------------|------------------------|-------|--------------------|----------------------|--------------------|-----------------------------------------|
| HCN                 | Klotz and Miller, 1947 | 273   | 131                | 153                  | 143                | 9                                       |
| acrylonitrile       | Lugg, 1968             | 298   | 80                 | 80                   | 87                 | 8                                       |
| ethyl cyanoacrylate | Lugg, 1968             | 298   | 54                 | 54                   | 56                 | 4                                       |
| benzonitrile        | Lugg, 1968             | 298   | 54                 | 54                   | 62                 | 15                                      |
| pyridine            | Hudson et al., 1960    | 318   | 81                 | 72                   | 82                 | 1                                       |
| piperidine          | Hudson et al., 1960    | 315   | 72                 | 66                   | 75                 | 4                                       |

#### Comments:

**HCN:** The diffusivity of HCN was measured only by one study (Klotz and Miller, 1947) at 273 K, and the measured diffusivity is 9% lower than the estimated value.

**acrylonitrile, ethyl cyanoacrylate, benzonitrile:** The diffusivities of acrylonitrile, ethyl cyanoacrylate and benzonitrile were measured at 298 K by Lugg (1968), which are 8%, 4%, and 15% lower than the estimated values.

**pyridine and piperidine:** The diffusivities of pyridine and piperidine were measured by one study (Hudson et al., 1960) at 318 and 315 K, respectively. Both measured values show excellent agreement with the estimated ones.

#### Preferred value in N<sub>2</sub> (or air/O<sub>2</sub>) at 298 K:

**HCN:** (153±14) Torr cm<sup>2</sup> s<sup>-1</sup>

The preferred diffusivity of HCN at 298 K, (153±14) Torr cm<sup>2</sup> s<sup>-1</sup>, is based on the measurement at 273 by Klotz and Miller (1947), extrapolated to 298 K. The given uncertainty reflects the difference between the measurement and estimation.

**acrylonitrile:** (80±7) Torr cm<sup>2</sup> s<sup>-1</sup>

**ethyl cyanoacrylate:** (54±2) Torr cm<sup>2</sup> s<sup>-1</sup>

**benzonitrile:** (54±8) Torr cm<sup>2</sup> s<sup>-1</sup>

The preferred diffusivities of acrylonitrile, ethyl cyanoacrylate and benzonitrile at 298 K are based on the measurements by Lugg (1968). The given uncertainties reflect the differences between the measurement and estimation.

**pyridine:** (72±1) Torr cm<sup>2</sup> s<sup>-1</sup>

**piperidine:**  $(66\pm 3)$  Torr cm<sup>2</sup> s<sup>-1</sup>

The preferred diffusivities of pyridine and piperidine are based on the measurement by Hudson et al. (1960), extrapolated to 298 K.

Last change in the preferred value: 11 July 2014

**References:**

Hudson, G. H., McCoubrey, J. C., and Ubbelohde, A. R.: Vapour diffusion coefficients and collision parameters for cyclic molecules, *Trans. Faraday Soc.*, 56, 1144-1151, 1960.

Klotz, I. M., and Miller, D. K.: Diffusion Coefficients and Molecular Radii of Hydrogen Cyanide, Cyanogen Chloride, Phosgene and Chloropicrin, *J. Am. Chem. Soc.*, 69, 2557-2558, 1947.

Lugg, G. A.: Diffusion coefficients of some organic and other vapors in air, *Anal. Chem.*, 40, 1072-1077, 1968.
